# Supplementary material for: Association of healthy lifestyle score with control of hypertension among treated and untreated hypertensive patients: a large cross-sectional study
Source: PeerJ. 2024 Apr 10;12:e17203. doi: 10.7717/peerj.17203 (PMC11015831; doi:10.7717/peerj.17203)
Supplement: Supplemental Information 1 [file peerj-12-17203-s001.xlsx]

## Sheet: Raw data-Peerj
No	Sex	Age(years)	Ethnicity	Education	Marital status	Height(cm)	Weight(kg)	WC(cm)	Physical activity	Healthy dietary habits	Smoking	Alcohol drinking	History of diabetes	Family history of hypertension	Antihypertensive medication	SBP(mmHg)	DBP(mmHg)	HLS
1	1	87	1	4	1	181.1	64.2	81	0	1	1	0	1	0	1	112	77	4
2	1	84	1	4	1	168	60	82	3	0	1	0	0	0	1	128	70	4
3	1	57	1	5	2	169	64	80	7	1	0	0	1	0	1	131	81	6
4	1	86	1	4	2	167	70	88	3	1	0	0	0	0	1	152	86	5
5	1	59	1	4	1	175	86	92	0	1	0	0	0	0	1	127	71	3
6	1	40	1	4	1	170	85	92	3	1	0	0	0	0	1	130	80	4
7	1	65	1	2	1	171.5	85	97	0	0	1	1	0	0	0	125	84	0
8	1	75	1	3	1	171.5	71	89.5	7	1	1	0	0	0	1	130	85	4
9	1	50	1	3	1	171.3	70.5	90	3	1	1	1	0	1	1	119	87	2
10	1	82	1	4	1	158	67	86	7	1	0	0	1	1	1	131	71	5
11	1	70	1	2	2	172.5	65.4	85	7	1	1	1	0	0	1	153	82	4
12	1	78	1	4	1	169	60	78	0	1	0	0	1	0	1	120	80	5
13	1	76	1	4	1	161	70.1	93	0	1	1	1	1	0	1	155	67	1
14	1	75	1	2	1	168	70	86	0	1	0	0	0	0	0	139	79	4
15	1	66	1	4	1	181.5	84.5	80	7	1	0	0	1	0	1	120	76	5
16	1	72	1	4	1	157	70.9	82	7	1	1	1	1	0	1	127	79	4
17	1	67	1	1	1	165.5	69.4	86.5	7	1	1	0	0	0	1	134	86	4
18	1	68	2	1	1	180	70	72	3	1	0	0	0	0	1	120	66	6
19	1	86	1	2	1	165	62	76	0	1	0	0	1	0	1	125	70	5
20	1	56	1	3	1	173	89	86	0	1	0	0	0	0	1	131	82	4
21	1	48	1	2	1	165	63.4	81	0	1	0	0	0	0	1	149	98	5
22	1	71	2	2	1	166.5	74.5	100	3	1	0	0	1	0	1	115	72	4
23	1	65	1	2	1	167.7	77.1	88	7	1	1	1	0	0	1	110	74	3
24	1	72	1	1	1	169	70	82	3	1	0	0	0	0	1	131	72	5
25	1	72	1	3	1	177.7	55.1	76	0	1	1	0	0	0	1	136	83	3
26	1	51	1	4	1	166	57.5	80	0	1	0	0	1	0	1	125	89	5
27	1	76	2	4	1	165	68.7	88	7	1	0	0	0	0	1	145	93	5
28	1	73	1	2	1	160	60	84	0	1	0	0	1	0	1	139	81	5
29	1	67	1	2	1	160	62	87	7	1	0	0	0	0	1	159	88	5
30	1	70	1	2	1	170	89	105.5	7	1	0	0	0	0	1	145	95	4
31	1	53	1	3	1	175	62	80	1	1	0	0	0	0	1	143	94	5
32	1	74	1	2	1	164	86	100	7	1	1	0	0	0	1	155	83	3
33	1	68	1	3	1	174.5	87.1	100.5	3	1	0	0	1	0	1	122	72	4
34	1	63	1	4	1	176	70	90.5	7	1	0	0	0	0	1	131	81	5
35	1	67	1	4	1	178	81.2	98	0	1	0	0	1	1	1	108	73	3
36	1	47	1	4	1	181	84	90	3	1	0	0	1	0	1	129	80	4
37	1	55	1	3	1	166	78	93	3	1	0	0	1	1	1	128	73	4
38	1	82	1	4	1	178	67.1	82	3	1	0	0	0	0	1	129	81	6
39	1	85	1	2	1	170	74	78	0	1	0	0	0	0	0	123	72	4
40	1	53	1	3	1	169	67	85	1	1	0	0	0	0	1	121	77	5
41	1	77	1	3	1	167	58	68	0	1	0	0	1	0	1	113	59	5
42	1	66	1	2	1	164.5	70.8	107	3	1	0	0	0	0	1	129	82	4
43	1	77	1	1	2	147	55	90	7	1	0	0	0	0	1	163	75	4
44	1	52	1	2	1	160	65	90	0	1	0	0	0	0	1	119	78	3
45	1	79	1	2	1	170	80.4	97	7	1	0	1	1	0	1	127	66	3
46	1	64	1	2	1	163.5	59.8	81	0	1	0	0	0	0	1	130	68	5
47	1	59	1	2	1	172	80	88	0	1	0	0	1	0	1	146	84	4
48	1	67	1	2	1	169	78.5	96	0	1	0	1	0	0	1	153	78	2
49	1	78	1	1	1	165	67	92	7	1	0	0	0	0	1	154	88	4
50	1	50	1	3	1	166.5	74.5	94	1	1	0	1	0	0	1	119	80	2
51	1	84	1	3	1	154	46.2	75	7	1	0	0	0	0	1	153	74	6
52	1	71	1	1	1	175	74	93	0	1	0	0	0	0	1	142	89	3
53	1	80	1	1	1	160.5	62.1	89	0	1	0	0	0	0	1	152	74	4
54	1	58	1	2	1	168	65	84	0	1	0	0	1	0	1	129	75	5
55	1	72	1	2	1	162	70	91	7	1	1	1	1	0	1	137	80	2
56	1	72	1	2	1	159.5	59.1	92	0	1	0	1	0	0	1	133	72	3
57	1	70	1	3	1	173	85	97	7	1	0	0	0	0	1	145	90	4
58	1	70	1	2	1	170	80	88	7	1	0	0	1	0	1	128	78	5
59	1	74	1	3	1	160.5	75	90	3	1	0	1	1	0	1	145	79	3
60	1	82	1	1	1	165	69.4	92	1	0	0	1	1	0	1	139	82	1
61	1	60	1	3	1	148.5	59.4	93	0	1	1	1	0	0	1	123	87	1
62	1	59	1	3	1	178	72	82	7	1	0	1	1	0	1	133	81	5
63	1	64	1	1	1	172	75	90	0	1	1	1	1	0	1	133	80	1
64	1	55	1	3	1	170	75	96	0	1	0	0	0	0	1	124	72	3
65	1	70	1	4	1	163	64.4	91	3	1	0	0	0	0	1	131	77	4
66	1	51	1	4	1	168	75	85	7	1	1	1	0	1	1	132	79	3
67	1	51	1	2	1	164	70	93	0	1	0	0	0	0	0	120	70	3
68	1	65	1	3	1	175	82	86	0	1	0	0	0	1	1	136	100	4
69	1	71	1	1	1	172.5	64	81	7	1	0	0	0	0	1	133	92	6
70	1	70	1	1	1	167	73.4	90	1	1	0	1	0	0	1	140	80	2
71	1	66	1	1	1	160	76.1	104	0	0	1	1	0	0	1	172	78	0
72	1	70	1	3	1	171	70.6	94	3	1	0	0	0	0	1	138	76	4
73	1	43	1	4	1	175	72	86	0	1	1	0	1	0	1	132	72	4
74	1	59	1	2	1	173.6	80.3	95	1	1	1	1	1	0	1	158	95	1
75	1	68	1	2	1	169	65.4	87	0	1	1	0	0	0	1	118	77	4
76	1	75	1	3	1	158	47	74	7	1	0	0	0	0	1	133	70	6
77	1	76	1	2	1	156.5	57.3	80	7	1	0	0	0	0	1	106	74	6
78	1	58	1	3	1	166	67	88	0	1	1	0	1	1	1	139	96	3
79	1	51	1	2	1	159.2	67.2	85	3	1	1	0	0	0	1	139	95	4
80	1	90	1	4	1	165	77	103	1	1	0	0	0	0	1	157	75	3
81	1	85	1	3	1	162.5	57.5	76	7	1	0	0	0	0	1	122	68	6
82	1	56	1	2	1	170	67.5	83	7	1	0	0	0	0	0	147	97	6
83	1	46	1	3	1	169	78	86	0	1	0	0	0	0	1	137	100	4
84	1	83	1	4	1	173	57	73.7	0	1	0	0	0	0	0	115	70	5
85	1	66	1	2	1	170	72.8	83	7	1	0	1	1	0	1	146	81	4
86	1	53	1	3	1	163.5	73.7	93	0	1	0	0	0	0	0	119	78	3
87	1	52	1	2	1	162.5	85.8	103	0	0	0	1	0	0	0	145	85	1
88	1	51	1	2	1	171	75.4	93	7	1	0	0	0	0	0	134	92	4
89	1	41	1	2	1	164	65	85	3	1	0	0	0	0	1	141	98	5
90	1	49	1	4	1	172	65	85	7	1	0	0	1	0	1	133	76	6
91	1	43	1	2	1	160	69	86	7	1	0	0	0	0	1	124	85	5
92	1	64	1	3	1	164	59.7	80	1	1	0	1	0	0	1	122	73	4
93	1	79	1	4	1	170	76	97	7	1	0	0	0	0	1	167	88	4
94	1	53	1	4	1	166.7	79.4	97.4	3	1	0	0	0	0	1	122	77	4
95	1	79	1	4	1	157.7	65.3	83	0	1	0	0	1	0	1	142	80	4
96	1	53	1	2	1	168	65.2	80	1	1	0	0	0	0	1	124	75	5
97	1	51	1	2	1	160	68	89	7	1	0	0	0	0	1	139	89	5
98	1	49	1	2	1	165	78	102	0	1	0	0	0	0	1	118	80	3
99	1	84	1	3	1	161	69	92	3	1	0	1	0	0	1	141	62	3
100	1	72	1	2	1	159.8	77.1	100	7	1	1	1	0	1	1	163	95	2
101	1	43	1	2	1	152	65	95	0	1	0	0	1	0	1	133	83	3
102	1	80	1	1	1	160	55	76	7	1	0	0	1	0	1	100	65	6
103	1	50	1	4	1	165	71.3	91	0	0	1	0	0	1	1	129	81	1
104	1	59	1	4	1	163	61	80	7	1	0	0	0	1	1	125	83	6
105	1	71	1	2	1	169.5	78.9	96	7	1	0	0	0	0	1	123	77	4
106	1	57	1	2	1	174	61.5	76	7	1	0	0	0	0	1	121	80	6
107	1	81	1	4	1	163.5	68.8	85	1	1	0	0	1	0	1	143	71	4
108	1	44	1	4	1	168	75	80	0	1	1	0	1	0	1	127	75	3
109	1	76	1	2	1	160	60	76	0	1	0	0	0	0	1	161	83	5
110	1	46	1	3	1	171	62	76	0	1	0	0	0	0	1	125	74	5
111	1	72	1	2	1	171	65	92	7	1	0	0	0	1	1	141	80	5
112	1	48	1	2	1	171	61	88	0	1	0	0	0	0	1	114	74	5
113	1	50	1	4	1	170	85	88	0	1	0	0	0	0	0	119	78	4
114	1	67	1	2	1	168.5	68.9	87	0	1	0	0	1	0	1	177	72	4
115	1	61	1	3	1	160	63	81	7	0	1	0	0	1	1	126	87	3
116	1	45	1	3	1	168	80	84	0	1	1	1	0	0	1	116	71	2
117	1	70	1	4	1	170	70	93	0	1	1	1	0	0	1	135	83	1
118	1	81	1	1	1	167	60	86	0	1	0	0	0	0	1	124	82	5
119	1	58	1	3	1	165	63.2	85	7	1	0	0	1	1	1	130	67	6
120	1	75	1	2	1	165	68	91	7	1	0	0	0	0	1	140	84	4
121	1	75	1	2	1	171	78.1	103	7	0	1	0	0	0	1	144	73	2
122	1	52	1	3	1	170	65	80	0	1	0	0	0	0	1	120	70	5
123	1	79	1	4	2	164.5	64.6	87	7	1	1	0	1	0	1	164	85	5
124	1	47	1	2	1	166	60	80	3	1	0	0	0	0	1	124	76	6
125	1	87	1	1	1	156	70	77	0	1	0	0	1	0	0	128	72	4
126	1	52	1	3	1	160	80	96	7	1	0	0	0	0	1	135	83	4
127	1	50	1	2	1	167.5	67.6	73	1	1	1	1	0	0	1	141	81	2
128	1	59	1	4	1	169.5	72.5	85	3	1	0	0	0	0	1	130	75	5
129	1	47	1	3	1	165	63	78	7	1	0	0	1	0	0	136	74	6
130	1	61	1	2	1	171	89	100	7	1	0	0	0	0	1	129	76	4
131	1	68	1	3	1	171.5	59.5	84.5	1	1	0	1	0	0	1	137	76	4
132	1	80	1	2	1	165.5	56.2	71	7	1	1	0	0	0	1	150	63	5
133	1	48	1	2	1	170	81	90	7	1	0	0	0	0	1	120	86	4
134	1	53	1	4	1	168	76.6	88	0	1	0	0	0	1	1	129	70	4
135	1	64	1	2	1	173	72	86	3	1	0	0	0	0	1	115	75	5
136	1	67	1	2	1	168	76	100	7	1	0	0	1	1	1	146	82	4
137	1	57	1	2	1	170	71	85	0	1	0	0	0	0	1	130	78	4
138	1	42	1	3	1	180	85	90	0	1	0	1	1	0	1	131	82	2
139	1	67	1	2	1	170	76	80	3	1	0	0	1	0	1	114	70	5
140	1	51	1	3	1	172	80	92	1	1	0	0	0	0	1	135	98	3
141	1	63	1	3	1	167.3	61.3	69.3	7	1	0	0	0	0	1	122	77	6
142	1	62	1	3	1	140	70	108	0	1	0	0	0	0	1	120	70	3
143	1	59	1	3	1	169	77.5	95	0	1	0	0	1	0	1	137	80	3
144	1	56	1	3	1	169.4	74.4	91	0	1	0	0	0	0	1	138	81	3
145	1	56	1	2	1	162	61	78	0	1	0	0	0	0	0	121	67	5
146	1	53	1	2	1	165	75	95	0	1	0	1	0	1	1	124	72	2
147	1	52	1	2	1	162	73.1	100	0	1	0	0	0	0	0	130	83	3
148	1	50	1	3	1	167	77	90	0	1	0	0	0	0	1	148	99	3
149	1	45	1	2	1	171	73	82	0	1	1	1	0	0	1	155	99	2
150	1	53	1	1	1	170.2	75.8	84	0	1	1	1	0	0	1	138	86	2
151	1	73	1	2	1	172.5	77.2	86	7	1	0	0	1	0	1	113	73	5
152	1	62	1	2	1	172	68	81	0	1	1	1	0	0	1	120	86	3
153	1	47	1	2	1	168.5	64.5	78	0	1	0	0	1	0	1	125	85	5
154	1	52	1	4	1	172	80	89	7	0	0	0	0	1	1	126	76	4
155	1	67	1	2	1	168	61	78	7	1	0	0	0	0	1	150	87	6
156	1	58	1	3	1	168.5	72.9	96	7	1	0	1	0	0	1	141	98	3
157	1	54	1	3	1	170	80	94	3	1	0	0	1	0	1	108	73	4
158	1	57	1	2	1	157	53	81	0	1	0	0	0	0	1	137	84	5
159	1	75	1	3	1	165.5	65.7	88	7	1	0	0	0	0	1	164	79	5
160	1	67	1	1	1	163	61.9	86	7	0	0	0	1	0	1	151	95	5
161	1	70	1	4	1	171.6	73.9	92	7	1	0	1	0	1	1	135	94	3
162	1	56	1	2	1	175	70	90	0	1	0	0	0	0	1	138	102	4
163	1	50	1	2	1	168	70	85	7	1	1	0	1	0	1	150	102	4
164	1	79	1	4	1	162	76.5	102	1	1	0	0	0	0	1	137	81	3
165	1	68	1	3	1	171	84.1	91	7	1	0	0	1	0	1	120	81	4
166	1	76	1	2	1	168.5	78.7	99	3	1	0	1	0	0	1	136	65	3
167	1	87	1	2	2	170	50	68	1	1	0	0	0	0	1	114	78	4
168	1	82	1	4	1	154	65	87	3	1	0	0	0	0	1	153	82	5
169	1	69	1	4	1	170.5	70.8	90	7	1	0	0	1	0	1	151	95	4
170	1	77	1	1	1	160.5	57	80	0	1	1	0	0	0	1	146	87	4
171	1	56	1	4	1	168.5	85.6	75	0	1	1	0	0	1	1	137	77	3
172	1	73	1	4	1	171	70	89	7	1	0	0	0	0	1	131	77	6
173	1	54	1	4	1	168	58	78	3	1	0	0	0	0	1	124	74	6
174	1	71	1	3	1	177	85.7	94	3	1	0	0	0	0	1	139	74	4
175	1	50	1	4	1	173	87	103	0	0	1	0	0	1	1	134	81	1
176	1	80	1	2	1	160.5	65.8	90	0	1	0	0	1	0	0	146	81	3
177	1	77	1	5	1	158	54	75	7	1	0	0	0	0	1	147	83	6
178	1	73	1	1	1	164	58	77	7	1	0	0	0	0	1	171	100	6
179	1	53	1	3	1	166	64.8	85	3	1	0	0	0	0	1	153	99	6
180	1	80	1	2	1	170	56.3	70	0	1	1	1	0	0	1	112	81	3
181	1	67	1	3	1	169	70.9	88	3	1	0	0	0	0	1	139	85	5
182	1	59	1	3	1	178	75	82	7	0	0	1	0	0	1	137	85	4
183	1	72	1	1	1	156	68	91	7	1	1	1	0	0	1	126	69	2
184	1	59	1	1	1	173	78	91	0	1	0	0	0	0	1	139	89	3
185	1	68	1	2	1	161	73	90	3	1	1	0	1	0	1	140	84	3
186	1	61	1	2	1	167	62.2	80	7	1	0	0	0	0	1	120	79	6
187	1	51	1	2	1	167	85	93	0	1	1	1	0	1	1	116	84	1
188	1	76	1	2	1	168	68	85	0	1	0	0	1	0	1	134	74	4
189	1	71	1	2	1	160	74.5	86	7	1	0	0	0	0	1	144	84	5
190	1	68	1	2	1	172	70	83	7	1	1	1	0	0	1	135	93	4
191	1	54	1	3	1	162.5	71.6	84	7	1	0	0	1	0	0	130	89	5
192	1	44	1	1	1	170	65	82	7	1	0	0	0	0	1	133	85	6
193	1	77	1	1	1	171	68.7	82	0	1	1	0	0	0	1	122	79	4
194	1	60	1	3	1	173.5	79.9	99	0	1	0	0	0	0	1	138	86	3
195	1	61	1	3	1	164	64	90	0	1	0	0	0	0	1	141	79	4
196	1	50	1	2	1	162	60	90	0	1	0	0	1	0	1	123	73	4
197	1	85	1	4	1	166.5	64.9	94	7	1	0	0	1	0	1	157	88	5
198	1	70	1	3	1	168	67.7	84	0	1	1	0	1	0	1	153	64	3
199	1	60	1	4	1	168	85	78	3	1	0	0	0	0	1	125	85	5
200	1	53	1	5	1	164	63.5	86	7	1	0	0	0	0	1	127	77	6
201	1	61	1	2	1	165	60	76	0	1	0	0	0	0	1	123	77	5
202	1	61	1	2	1	171	62	80	0	1	1	0	0	0	1	133	76	4
203	1	54	1	2	1	165	62.4	81	7	1	0	0	1	0	1	111	68	6
204	1	72	1	3	1	167	70.2	91	0	1	1	0	0	0	1	135	75	2
205	1	70	1	3	1	168	66	84	3	1	0	0	0	0	1	138	96	6
206	1	51	1	2	1	176	62	74	1	1	0	0	0	0	1	106	76	5
207	1	88	1	4	1	162	55	84	7	1	0	0	1	0	1	134	85	6
208	1	87	1	4	1	165	74	98	7	1	0	0	0	0	1	117	68	4
209	1	55	1	4	1	176	74	84	7	1	0	0	0	0	1	128	76	6
210	1	81	1	1	1	164.5	81.8	101	0	1	1	1	0	0	1	134	71	1
211	1	54	1	3	1	168.5	74	85	0	1	0	0	0	0	1	126	75	4
212	1	88	1	3	1	173	78	93	7	1	0	0	1	0	1	111	63	4
213	1	75	1	4	1	175.5	73	80	0	1	1	1	0	0	1	128	77	3
214	1	63	1	4	1	167	82.5	85	0	1	0	1	0	1	1	120	80	3
215	1	78	1	4	1	165.5	66.5	84	3	1	0	0	0	0	1	157	99	5
216	1	67	1	3	1	171.5	83.7	103	7	1	1	1	0	1	1	131	81	2
217	1	65	1	3	1	174.5	70.4	91	0	1	0	0	0	0	1	122	78	4
218	1	50	1	3	1	168	70	83	7	1	0	0	0	0	1	125	83	5
219	1	54	1	3	1	166	81.2	98	3	1	0	1	0	0	0	147	91	3
220	1	42	1	2	1	163	70	70	1	0	1	1	0	1	1	125	83	1
221	1	71	1	3	1	165	70	90	3	1	1	0	0	0	1	113	77	3
222	1	50	1	2	1	174	81	90	0	1	0	1	0	1	0	131	79	2
223	1	66	1	1	1	164.2	67.3	88	0	1	1	1	0	1	1	131	90	2
224	1	76	1	2	1	162	70.5	95	0	1	0	0	0	0	1	145	93	3
225	1	74	1	4	1	166	68.1	84	1	1	1	0	0	0	0	141	78	3
226	1	72	1	3	1	169	74	80	7	1	0	1	1	0	1	135	84	4
227	1	67	1	3	1	163	63.5	83	7	1	0	0	0	1	1	145	87	6
228	1	67	1	4	1	182	75	82	7	1	0	1	0	1	1	129	69	5
229	1	62	1	4	1	168	68	85	7	1	1	0	0	0	1	133	77	4
230	1	73	1	4	1	162	60.5	84	7	1	0	0	1	1	1	122	85	6
231	1	69	1	2	1	170.5	83.6	94	7	1	0	0	0	0	1	126	78	4
232	1	68	1	4	1	165	64.3	84	7	1	1	1	0	0	1	129	78	4
233	1	61	1	3	1	165	69	84	3	1	1	0	1	0	1	144	82	4
234	1	51	1	2	1	167	65	80	0	1	0	0	0	0	1	132	75	5
235	1	47	1	2	1	176	72	76	7	1	0	0	0	0	1	122	73	6
236	1	65	1	3	1	165	55	80	0	0	0	0	0	0	1	136	81	4
237	1	64	1	3	1	165.5	66.5	85	3	1	0	0	1	0	1	132	74	5
238	1	56	1	1	1	165	61	75	0	1	0	0	0	0	1	120	88	5
239	1	49	1	2	1	170	79	90	0	1	1	0	0	0	1	138	91	2
240	1	49	1	3	1	160	61	83	1	1	0	0	0	0	1	127	78	5
241	1	47	1	2	1	165	55	70	0	1	0	0	0	0	1	138	86	5
242	1	56	1	1	1	169	67	80	3	1	0	0	0	0	1	130	80	6
243	1	69	1	1	1	170	68	90	7	1	0	0	1	0	1	146	77	5
244	1	60	1	4	1	166	64.8	82.8	0	1	0	0	0	0	1	121	64	5
245	1	53	1	2	1	166	68	88	3	1	0	0	0	0	1	138	87	5
246	1	50	1	2	1	168	76	92	0	1	0	0	0	0	1	136	87	3
247	1	46	1	4	1	170	67	86	7	1	0	0	0	0	0	130	70	6
248	1	59	1	2	1	165	70	80	7	1	0	0	0	0	1	129	78	5
249	1	58	1	3	1	165.5	86.4	102	0	1	0	0	1	0	0	126	86	3
250	1	55	1	2	1	172.6	70.7	86.5	7	1	0	0	0	1	1	124	81	6
251	1	54	1	2	1	163.5	60.1	87	1	1	0	0	0	0	1	133	84	5
252	1	50	1	3	1	173	73	89	7	1	1	1	0	1	1	138	88	3
253	1	50	1	1	1	164	51.1	72.5	0	1	0	0	0	0	1	153	97	5
254	1	49	1	2	1	158	58	65	7	0	0	0	0	0	1	131	79	5
255	1	60	1	2	1	148	47.3	80	0	1	1	0	1	0	1	124	87	4
256	1	53	1	3	1	177.5	76	90	0	1	1	1	0	0	0	118	78	1
257	1	49	1	2	1	167	68	78	0	1	0	0	0	0	1	132	83	4
258	1	84	1	4	1	165	70	83	0	1	0	0	0	0	1	137	79	4
259	1	76	1	1	1	163.5	78.7	104	3	1	1	0	1	0	1	140	74	3
260	1	67	1	3	1	170	88	89	7	1	0	1	0	1	1	123	76	4
261	1	52	1	2	1	164.5	81.5	101	0	1	1	0	0	0	0	122	83	2
262	1	40	1	2	1	156	60	80	3	1	0	0	0	0	1	114	72	5
263	1	53	1	3	1	163	68	86	3	1	1	0	0	0	1	136	90	4
264	1	44	1	4	1	166	70	86	0	1	0	0	0	0	1	128	74	4
265	1	48	1	2	1	168	72	84	3	1	0	0	0	0	1	138	82	5
266	1	54	1	2	1	161	71.8	90	0	1	0	1	0	0	1	129	81	2
267	1	72	1	3	1	165.5	63.5	85	0	1	0	0	0	0	1	125	79	5
268	1	57	1	3	1	171	68	89	7	1	1	1	0	0	1	135	75	4
269	1	50	1	3	1	170	70	78	0	1	0	0	0	0	1	143	74	4
270	1	71	1	2	1	163	67	91	7	1	0	0	0	0	0	164	78	4
271	1	53	1	4	1	163	67	84	0	1	0	0	0	1	1	121	81	4
272	1	52	1	2	2	171	57.5	74	3	1	0	0	0	0	1	131	90	6
273	1	80	1	4	1	145	53.8	84	7	1	0	0	0	0	1	177	80	5
274	1	76	1	3	1	163	76	98	7	1	1	0	1	0	1	118	82	3
275	1	73	1	3	1	169	73.1	91	3	1	0	0	1	1	1	125	71	4
276	1	71	1	3	1	164.5	68	88	7	1	1	0	0	0	0	116	74	4
277	1	73	1	2	1	179.5	76.2	100	3	1	0	0	0	1	1	134	67	5
278	1	56	1	3	1	159.5	63.7	86	0	1	1	0	0	0	1	124	83	3
279	1	55	1	1	1	168	60	78	3	1	1	0	0	0	1	136	86	5
280	1	56	1	2	1	163	73	86	0	1	0	0	0	0	1	130	75	4
281	1	55	1	3	1	171.5	73.5	84	7	1	0	0	0	1	1	136	80	5
282	1	56	1	3	1	168	57.5	75.8	0	1	0	0	0	0	0	128	73	5
283	1	51	1	2	1	159	49.6	73	0	1	0	0	0	0	0	151	100	5
284	1	66	1	3	1	172	82.5	88	7	1	0	0	1	0	1	131	87	5
285	1	58	1	3	1	165	80	95	7	1	1	0	0	0	1	133	85	3
286	1	78	1	1	1	167	60.9	87	3	1	0	1	0	0	0	163	74	5
287	1	84	1	1	1	166	65	86	0	0	0	0	0	0	1	168	99	4
288	1	56	1	2	1	167	62	84	7	1	0	0	0	0	1	135	88	6
289	1	83	1	3	1	158.5	69.2	94	0	1	0	0	0	0	1	159	73	3
290	1	70	1	3	1	179	73	92	7	1	0	1	0	0	0	121	73	4
291	1	67	1	2	1	166	67	84	0	1	0	0	0	0	1	110	70	4
292	1	67	1	3	1	160	66	86	7	1	1	0	1	1	1	126	71	4
293	1	59	1	3	1	166	58.3	80	1	1	1	0	0	0	1	141	99	4
294	1	77	1	3	1	171	65	86	7	1	0	0	0	0	1	134	81	6
295	1	62	1	3	1	169	65.8	79	7	1	1	1	0	0	1	124	72	4
296	1	68	1	2	1	161	64	88	7	1	0	1	1	0	1	134	75	4
297	1	62	1	3	1	170	65	84	0	1	0	0	0	0	1	124	71	5
298	1	59	1	2	1	175	72	90	0	1	0	0	0	0	1	130	82	4
299	1	55	1	3	1	168	65	78	0	1	0	0	0	0	1	120	80	5
300	1	54	1	1	1	157.5	63.2	86	1	1	0	0	1	0	1	143	75	4
301	1	86	1	4	1	159	56.5	89	7	1	1	0	0	0	1	153	85	5
302	1	58	1	3	1	163.5	66.3	85	7	1	0	0	0	1	1	134	80	5
303	1	57	1	3	1	173	68	92	0	0	0	0	0	0	1	128	78	3
304	1	54	1	2	1	168	77	83	3	0	0	0	0	0	1	131	83	4
305	1	58	1	2	1	168	80	102	3	1	1	0	0	0	1	126	73	3
306	1	57	1	2	1	171	67	71.9	3	0	0	1	0	0	1	122	81	4
307	1	51	1	3	1	169	67	80	0	0	0	0	0	0	1	127	83	4
308	1	43	1	3	1	172.5	83	97	0	1	1	0	0	0	1	111	71	2
309	1	43	1	3	1	167	55	68	3	1	0	0	0	0	1	123	80	6
310	1	71	1	1	1	156	50.5	74	3	1	1	1	0	0	1	141	90	4
311	1	55	1	3	1	165	75	90	0	1	0	0	1	0	1	134	79	3
312	1	58	1	2	1	165	63	68	7	1	1	1	0	0	1	102	64	4
313	1	63	1	2	1	160.5	77	103	3	1	0	0	1	0	1	155	90	4
314	1	79	1	4	1	172	82	95	0	1	0	1	1	0	1	131	76	2
315	1	72	1	3	1	177	67	88	0	1	1	1	0	0	1	129	81	3
316	1	70	1	3	1	165	60	81	0	1	0	0	1	0	1	135	74	5
317	1	69	1	4	1	171	64	80	7	1	0	0	1	0	1	142	85	6
318	1	68	1	3	1	160	67	98	0	1	0	0	1	0	1	143	95	3
319	1	48	1	3	1	168	74	88	0	1	0	0	0	1	1	134	85	4
320	1	69	1	2	1	165.6	71.4	92	0	1	0	0	0	0	1	145	82	3
321	1	46	1	2	1	166	74.5	96	3	1	0	0	1	1	1	128	83	4
322	1	53	1	2	1	163	61.6	80	7	1	0	0	1	0	1	122	88	6
323	1	53	1	3	1	172	68	78	0	1	0	0	0	0	0	170	99	5
324	1	94	1	1	2	164	68	100	7	1	0	0	0	1	1	159	86	4
325	1	86	1	1	1	157	54	74	0	1	0	0	0	0	1	151	93	5
326	1	86	1	1	1	161	55	76	7	1	1	0	0	0	1	140	86	5
327	1	85	1	1	1	158	56	80	7	1	0	0	0	0	1	159	81	6
328	1	80	1	1	1	168	70	90	7	1	0	0	0	0	1	139	82	4
329	1	78	1	3	1	160	67	89	7	1	0	0	0	0	1	127	73	5
330	1	78	1	1	1	153	56	80	3	1	0	0	0	0	1	133	77	6
331	1	78	1	1	1	150	58	87	7	0	1	0	0	0	1	126	77	3
332	1	77	1	1	1	166	79	96	3	1	1	1	0	0	1	149	72	2
333	1	76	1	1	1	160	73	96	7	1	0	0	0	0	1	132	83	4
334	1	73	1	1	1	165	63	90	0	0	0	0	1	0	1	133	80	3
335	1	73	1	2	1	157	60	82	7	1	1	1	0	0	1	124	68	3
336	1	72	1	1	1	161	61	65	0	1	0	0	0	0	1	133	85	5
337	1	71	1	1	1	173	68	87	7	1	0	1	0	0	1	150	93	5
338	1	66	1	2	1	170	65	70	0	1	0	0	0	0	0	100	70	5
339	1	65	1	2	1	174	75	92	7	1	0	0	0	0	1	141	92	4
340	1	65	1	3	2	160.5	61.2	79	1	1	1	0	0	1	1	131	87	4
341	1	64	1	1	1	167	63	84	7	1	0	0	0	0	1	125	80	6
342	1	64	1	3	1	165	75	84	1	1	0	0	0	0	1	129	79	4
343	1	63	1	3	1	168	70	82	7	1	0	0	0	0	1	118	88	5
344	1	61	1	3	1	168	76	88	3	1	1	0	0	1	1	128	75	4
345	1	59	1	2	1	150	58	92	0	1	0	0	1	0	0	151	88	3
346	1	57	1	2	1	165	55	82	3	1	1	1	0	0	1	128	74	4
347	1	57	1	2	1	172	63	78	0	1	1	1	0	1	1	126	76	3
348	1	57	1	1	1	166.9	68	70	3	1	0	0	0	0	1	132	77	5
349	1	54	1	3	1	175	84	88	0	0	1	1	0	0	1	129	73	1
350	1	104	1	2	2	169.9	57.1	85	0	1	0	1	0	0	1	126	86	4
351	1	98	1	2	1	168	55	75	0	1	0	0	0	0	1	116	79	5
352	1	97	1	2	1	168	60	74	0	1	0	0	0	0	1	129	84	5
353	1	97	1	1	2	169	68	80	0	1	0	0	0	0	1	123	70	5
354	1	97	1	1	1	156	57.3	90	7	1	0	1	0	0	1	142	57	4
355	1	96	1	1	1	174	68	70	0	1	0	0	1	0	1	125	75	5
356	1	96	1	2	1	165.5	51	80	7	1	0	0	1	0	1	131	70	6
357	1	95	1	1	1	167	77	84.5	1	1	0	0	1	0	0	145	80	4
358	1	94	1	2	1	173	78	108	1	1	0	0	0	0	1	143	85	3
359	1	93	1	1	2	167.2	75	103	0	1	0	0	0	0	1	152	82	3
360	1	93	1	4	1	167.6	78.8	100	7	1	0	0	0	1	1	143	66	4
361	1	93	1	4	2	166	66	78	0	1	0	0	0	0	1	149	71	4
362	1	92	1	1	1	160	50	85	0	1	0	0	0	0	1	133	74	5
363	1	91	1	2	1	167	63	79	0	1	0	0	0	0	1	123	87	5
364	1	91	1	1	1	161	58.4	89	7	1	0	1	0	0	1	134	74	5
365	1	91	1	1	1	169	68	75	0	1	0	0	0	0	1	129	75	5
366	1	91	1	4	1	154	64.6	94	7	1	0	0	0	0	1	142	75	4
367	1	90	1	2	1	172	68	84	7	1	1	0	0	0	1	129	74	5
368	1	90	1	1	1	164	56	76	3	1	0	0	0	0	1	136	69	6
369	1	90	1	2	2	162	69.9	86	0	1	0	0	0	0	1	157	103	4
370	1	90	1	1	1	152	54	78	0	1	0	0	0	0	1	126	62	5
371	1	90	1	3	1	168	60	75	3	1	0	0	1	0	1	120	77	6
372	1	90	1	3	1	158	61	88	7	1	0	0	0	0	1	173	79	5
373	1	89	1	1	1	150	62	90	0	1	0	0	1	0	1	126	69	3
374	1	89	1	2	2	161	61.5	90	3	1	0	0	0	0	1	136	72	5
375	1	89	1	1	1	158	60	84	7	1	0	0	0	0	1	129	68	5
376	1	89	1	1	1	165.5	54.2	87	0	1	1	1	0	0	1	157	86	3
377	1	89	1	3	1	166	65.9	84	0	1	0	0	1	0	1	152	69	5
378	1	89	1	1	1	162	54.7	80	0	1	0	0	0	0	1	124	65	5
379	1	89	1	2	1	160.5	58.5	80	7	1	0	0	0	0	0	174	96	6
380	1	89	1	1	2	164	66.2	79	7	1	0	0	0	0	1	152	69	5
381	1	89	1	2	1	177	76	80	0	1	0	0	0	0	1	126	72	4
382	1	89	1	1	1	156.5	60	76	7	1	0	0	0	0	1	124	72	5
383	1	88	1	1	1	151	54.1	84	0	1	0	0	0	0	1	129	69	5
384	1	88	1	1	2	167	60	78	7	1	0	0	0	0	1	121	69	6
385	1	88	1	1	1	166	67	96	7	1	1	0	1	0	1	125	68	3
386	1	88	1	3	1	165	61	85	0	1	0	0	0	0	1	154	83	5
387	1	88	1	2	1	169	58	72	0	1	0	0	0	0	1	124	78	5
388	1	88	1	3	2	160	62	84	1	1	0	0	0	0	0	150	88	4
389	1	88	1	4	1	169.9	63.6	85	7	1	0	0	0	0	1	144	83	6
390	1	88	1	3	1	160	70.5	103	7	1	0	0	0	0	1	144	82	4
391	1	88	1	1	1	156.5	61.2	89	0	1	0	0	0	0	1	137	81	4
392	1	87	1	1	1	158.6	58.7	78	0	1	0	0	0	0	1	167	102	5
393	1	87	1	2	1	160	56.8	85	1	1	0	0	0	0	1	131	67	5
394	1	87	1	3	1	162	63.6	86	7	1	0	1	1	0	1	136	74	4
395	1	87	1	5	1	165	61	84	3	1	0	0	0	0	1	149	86	6
396	1	86	1	1	1	165	57.5	80	3	1	0	0	0	0	1	142	62	6
397	1	86	1	2	1	167.3	73	99	7	1	1	0	0	0	1	159	75	3
398	1	86	1	1	1	169.5	70.5	90	7	1	0	0	0	0	1	132	79	4
399	1	86	1	1	1	165	71.5	85	0	1	0	0	0	0	1	125	67	4
400	1	86	1	4	1	164	61	94	0	1	0	0	1	1	1	159	82	4
401	1	86	1	3	1	164	67	87	7	1	0	0	1	0	1	133	78	5
402	1	86	1	1	1	165	72	80	0	1	1	1	0	0	1	128	78	2
403	1	85	1	2	1	162	61.5	80	0	1	1	0	0	0	1	131	81	4
404	1	85	1	4	1	161.5	84	108	1	1	0	1	0	0	1	149	79	2
405	1	85	1	1	1	160	55	80	3	1	1	0	0	0	1	138	81	5
406	1	85	1	3	1	175	70	79	7	1	0	0	0	0	0	135	84	6
407	1	85	1	4	1	172.9	65.5	84	7	1	0	0	0	0	1	173	72	6
408	1	85	1	2	1	171	81	95	7	1	0	0	0	0	1	131	68	4
409	1	85	1	4	1	168	85.5	96	3	1	0	1	0	0	1	124	70	3
410	1	85	1	2	1	167	78	101	3	1	0	0	0	0	1	155	86	4
411	1	85	1	1	2	153.5	58.7	88	7	1	0	0	0	0	1	122	59	5
412	1	85	1	2	1	166.5	68.7	73	7	1	0	0	0	0	1	136	78	5
413	1	84	1	3	1	160	79.4	97	7	1	0	0	0	0	1	155	91	4
414	1	84	1	4	1	158	58	87	7	1	0	0	0	0	1	150	80	6
415	1	84	1	3	1	165	69.7	90	7	1	0	0	0	1	1	142	76	4
416	1	84	1	2	1	160	61.1	83	7	1	0	0	0	0	1	153	74	6
417	1	83	1	3	1	171.5	82.7	97	7	1	1	0	1	0	1	167	77	3
418	1	83	1	1	1	153	55	88	0	1	0	0	0	0	1	136	79	5
419	1	83	1	4	1	175	64	80	7	1	0	0	0	0	1	133	85	6
420	1	83	1	1	1	163	60.1	80	1	0	0	0	1	0	1	137	77	4
421	1	83	1	4	1	155.5	68.5	99	3	1	0	0	0	0	1	151	70	4
422	1	83	1	4	1	166	61.7	88	7	1	0	0	1	0	1	126	66	6
423	1	83	1	2	1	166	73.3	94	3	1	0	0	1	0	1	163	71	4
424	1	83	1	2	1	165	79	102	3	1	0	0	1	0	1	139	78	4
425	1	83	1	1	1	167	67	80	0	1	0	0	1	0	1	134	76	4
426	1	83	1	3	1	155	54.3	88	7	1	0	0	0	0	1	127	70	6
427	1	83	1	2	1	162	70	75	0	1	0	0	0	0	1	130	85	4
428	1	83	1	3	1	159.5	54	85	7	1	0	0	0	0	1	123	63	6
429	1	83	1	2	1	160	57	80	0	1	0	0	1	0	1	135	75	5
430	1	83	1	2	2	158.8	48.7	68	0	1	1	1	0	0	1	145	75	3
431	1	83	1	3	1	169	71.2	88	1	1	1	0	0	0	1	155	98	3
432	1	83	1	4	1	168.5	64.6	86	7	1	0	0	0	0	1	145	77	6
433	1	83	1	2	2	158.5	73.5	93	0	1	0	0	1	0	0	140	73	3
434	1	83	1	2	1	164	71.5	90	7	1	0	0	0	1	1	146	63	4
435	1	82	1	1	1	162	61	83	7	1	1	1	1	0	1	112	83	4
436	1	82	1	3	1	166.1	73.9	91	0	1	1	0	0	0	1	137	78	2
437	1	82	1	2	1	161	65	86	3	1	1	0	0	0	1	137	70	4
438	1	82	1	2	1	154	49.1	77	7	1	1	1	0	0	1	142	67	4
439	1	82	1	2	1	165	72	78	0	1	0	0	0	1	1	135	77	4
440	1	82	1	2	1	169	64.9	84	7	1	0	0	0	0	1	153	83	6
441	1	82	1	1	1	172	72	88	0	1	0	0	0	0	1	131	79	4
442	1	81	1	1	2	170	60	76	0	1	1	0	0	1	1	126	82	4
443	1	81	1	2	1	166.1	60.1	78	7	1	0	0	0	0	0	129	61	6
444	1	81	1	3	1	171.8	72.8	86	7	1	0	0	0	1	1	159	87	5
445	1	81	1	1	1	161.2	69.2	85	0	1	1	0	0	0	1	131	70	3
446	1	81	1	3	1	175	63.2	79	0	1	0	0	1	0	1	145	70	5
447	1	81	1	2	1	166	72.5	99	7	1	0	0	0	0	1	159	96	4
448	1	81	1	2	1	165	68.5	86	7	1	0	0	0	0	1	133	76	5
449	1	81	1	2	1	162.5	61.5	80	7	1	0	0	0	0	1	129	79	6
450	1	81	1	4	1	161.5	55.5	76	7	1	0	0	1	0	1	139	87	6
451	1	80	1	4	1	163	66.8	86	7	1	0	0	0	0	1	153	77	5
452	1	80	1	2	1	168	61.6	80	7	0	0	0	0	0	1	150	76	5
453	1	80	1	3	1	159	76.2	103	3	1	1	1	1	0	1	134	78	2
454	1	80	1	1	1	165.5	69	91	7	1	0	0	0	0	1	158	90	4
455	1	80	1	1	2	160.5	73	80	0	1	0	0	0	0	1	116	81	4
456	1	80	1	2	1	165	52	80	3	1	0	0	0	0	1	145	85	6
457	1	80	1	3	1	167.5	65.2	91	7	0	0	0	1	1	1	137	82	4
458	1	80	1	5	1	171	67	84	3	1	0	0	0	0	1	127	77	6
459	1	80	1	1	1	168	72	88	0	1	0	1	1	0	1	127	79	3
460	1	79	1	1	1	161	54	74	1	1	0	0	1	0	1	122	81	5
461	1	79	1	2	1	168	48	75	3	1	0	0	0	0	0	125	77	5
462	1	79	1	2	1	167	66	85	7	1	0	0	0	0	1	129	79	6
463	1	79	1	3	1	157	57.7	90	7	1	0	0	1	0	1	103	70	5
464	1	79	1	3	1	164.7	63.4	76	3	1	0	0	0	0	1	133	75	6
465	1	79	1	2	1	161.5	60.5	83	7	1	0	0	1	0	1	139	88	6
466	1	79	1	1	1	150	65	85	7	1	0	0	1	0	1	125	75	5
467	1	79	1	3	1	164	65	85	7	1	0	0	1	0	1	133	82	5
468	1	79	1	4	1	155	52.4	88	7	1	0	0	0	0	1	151	69	6
469	1	79	1	3	1	159	54.6	76	0	1	0	0	0	0	1	119	63	5
470	1	79	1	1	1	165	60	89	3	1	0	0	1	0	1	130	71	6
471	1	79	1	3	1	156.4	67.2	92	0	1	0	0	1	1	1	127	76	3
472	1	79	1	4	1	160	51.9	71	0	1	0	0	0	0	0	118	60	5
473	1	78	1	2	1	167.5	88	103	3	1	0	0	0	0	1	159	94	4
474	1	78	1	4	1	167.4	71.6	92	7	1	0	1	0	0	1	132	91	3
475	1	78	1	1	1	159.7	58.3	82	0	1	0	0	1	0	1	153	77	5
476	1	78	1	3	1	169.5	83.1	98	0	0	1	1	1	0	1	127	60	0
477	1	78	1	1	1	170	72	100	1	1	0	0	1	0	0	133	60	3
478	1	78	1	3	1	169	52.5	78	0	1	1	0	0	0	1	138	77	3
479	1	78	1	1	1	158.8	73	80	0	1	1	1	0	0	1	145	82	2
480	1	78	1	2	1	160	65	90	7	1	0	0	0	0	1	166	63	4
481	1	78	1	2	1	159	60.5	84	7	1	0	0	0	1	1	115	74	6
482	1	78	1	1	1	174	78.6	94	7	1	1	0	1	1	1	159	77	3
483	1	78	1	1	1	163	65	85	7	1	0	0	1	0	1	137	79	5
484	1	78	1	1	1	168	76.3	83	7	1	1	1	0	0	1	135	70	3
485	1	78	1	2	1	168	62	82	7	1	0	0	0	0	1	151	82	6
486	1	78	1	3	1	168	56.5	82	0	1	0	0	1	0	1	138	86	5
487	1	78	1	3	1	160	53.9	85	7	1	0	0	0	1	1	114	67	6
488	1	77	1	4	1	172	82	101	7	1	0	0	0	0	1	155	100	4
489	1	77	1	1	2	160	78	106	0	1	1	1	0	1	1	135	85	1
490	1	77	1	3	1	167.5	77.4	96	7	1	1	0	0	1	1	121	80	3
491	1	77	1	4	1	163	83	100	7	1	0	0	0	0	1	159	90	4
492	1	77	1	4	1	168	57	85	3	1	1	0	0	0	1	123	80	5
493	1	77	1	3	1	163	65	82	0	1	0	0	0	0	1	138	85	4
494	1	77	1	1	1	172	70.8	72	3	1	0	0	0	0	1	133	69	6
495	1	77	1	4	1	160.5	67.7	86	0	1	1	0	1	0	1	149	87	3
496	1	77	1	3	1	162	61	82	7	1	0	0	0	0	1	139	67	6
497	1	77	1	3	1	163	62	80	7	1	0	0	0	0	1	129	80	6
498	1	77	1	1	1	176	72.3	93	7	1	0	0	0	0	1	128	85	5
499	1	77	1	2	1	178	70	80	3	1	0	0	0	0	1	130	80	6
500	1	77	1	3	1	166	79	100	3	1	1	1	0	0	1	143	94	2
501	1	77	1	3	1	155.5	58.3	84	1	1	0	1	0	0	1	119	60	3
502	1	77	1	4	1	157.6	45	77	7	1	1	1	0	0	1	110	67	3
503	1	77	1	2	1	171.2	71.6	81.8	7	1	0	0	0	0	1	129	87	5
504	1	77	1	3	1	157	70.9	94	0	1	0	0	1	0	1	133	66	3
505	1	77	1	2	1	159	50	72	0	1	1	0	0	0	1	130	80	4
506	1	77	1	1	1	166.5	69	89	7	1	0	0	0	1	1	149	88	5
507	1	76	1	3	1	158.6	70.5	89	3	1	1	1	0	0	1	131	71	3
508	1	76	1	1	1	168	60	78	7	1	0	0	1	0	1	121	61	6
509	1	76	1	2	1	168	62.7	86.5	7	1	0	0	0	1	1	152	88	6
510	1	76	1	3	1	166	69.8	96	3	1	0	0	0	0	0	157	89	4
511	1	76	1	2	1	165	84	106	3	1	1	0	0	0	1	121	79	3
512	1	76	1	1	1	164	67.6	87	3	1	0	0	1	0	1	165	84	5
513	1	76	1	2	1	165	77.9	98	0	1	0	0	1	0	1	141	82	3
514	1	76	1	3	1	172	69	94	0	1	1	0	0	0	1	161	97	3
515	1	76	1	3	1	161.5	70.5	90	0	1	0	0	0	0	1	163	83	3
516	1	76	1	3	1	168	64.7	80	0	0	1	1	0	0	1	149	79	2
517	1	76	1	1	1	156.6	60	72	7	1	0	0	1	0	1	121	73	5
518	1	76	1	4	1	165	67	83	7	1	0	0	0	0	1	119	69	5
519	1	76	1	1	1	163.4	68.9	87	7	1	1	0	0	1	1	131	78	4
520	1	76	1	3	1	155	57.5	81	7	1	0	0	0	0	1	103	68	6
521	1	76	1	4	1	168	66.7	86	7	1	1	0	0	0	1	163	69	5
522	1	76	1	3	1	174	68	82	7	0	1	1	0	1	1	128	77	3
523	1	75	1	2	2	164	60.3	77	7	1	1	0	0	0	1	128	60	5
524	1	75	1	1	1	163	82	105	0	1	1	0	0	1	1	165	102	2
525	1	75	1	3	1	165	69.7	85	0	1	1	1	1	1	1	130	76	2
526	1	75	1	2	1	164	83.7	103	1	1	1	0	0	0	1	144	61	2
527	1	75	1	2	1	159	63	94	7	1	0	1	1	1	1	144	65	3
528	1	75	1	2	1	150.5	62.8	89	7	1	1	0	0	0	1	139	81	4
529	1	75	1	3	1	161.9	55	80	3	1	1	0	1	0	1	142	82	5
530	1	75	1	3	1	166	62	76	7	1	0	0	0	1	1	132	71	6
531	1	75	1	3	1	151.5	56.6	85	0	1	1	0	1	0	1	152	63	3
532	1	75	1	3	1	170.4	74.1	87	7	1	0	0	0	0	1	151	91	5
533	1	75	1	3	1	172	70	80	0	1	1	1	0	0	1	123	78	3
534	1	75	1	3	1	164	71.2	95	0	1	1	0	0	0	1	129	69	2
535	1	75	1	3	1	168	57	82	7	1	1	0	0	1	1	127	65	5
536	1	75	1	3	2	163	65	92	7	1	0	0	0	0	0	121	77	4
537	1	75	1	3	1	154.2	63.4	94	0	1	0	0	1	1	1	114	77	3
538	1	75	1	3	1	160	69	95	7	1	0	0	1	0	1	163	99	4
539	1	75	1	3	1	171	72	81	0	1	0	0	0	0	1	140	81	4
540	1	75	1	1	1	176	72	86	0	1	1	0	0	0	1	117	75	4
541	1	75	1	3	1	158.5	72.5	90	0	1	0	0	0	0	1	136	88	3
542	1	75	1	2	1	169	55.4	80	3	1	1	0	1	0	1	126	80	5
543	1	75	1	2	1	158	51.5	80	7	1	0	0	0	0	1	137	75	6
544	1	75	1	2	1	160	54	79	0	1	0	0	1	0	1	129	75	5
545	1	75	1	1	1	158	65	88	3	1	0	0	1	0	1	162	99	5
546	1	75	1	2	2	165	61	78	7	1	0	0	0	0	1	143	79	6
547	1	75	1	2	1	161	61	78	1	1	0	0	0	0	1	140	80	5
548	1	75	1	4	1	162	68.6	78	7	1	1	0	0	0	1	143	83	4
549	1	75	1	4	1	170	64	82	3	1	0	0	0	0	1	135	76	6
550	1	75	1	3	1	156	77	99	7	1	1	0	0	1	1	133	70	3
551	1	75	1	2	1	158.5	65	89	7	1	0	0	0	0	1	146	86	5
552	1	75	1	3	1	169	61	81	7	1	0	0	1	0	1	119	62	6
553	1	75	1	1	1	170	65	80	0	1	0	0	0	0	1	125	75	5
554	1	75	1	3	1	167	73.2	94	0	1	1	0	0	0	1	149	79	2
555	1	74	1	3	1	153.5	57	87	7	1	1	1	0	0	1	143	88	3
556	1	74	1	3	1	159	60	85	0	1	0	0	0	0	1	131	76	5
557	1	74	1	1	1	159.5	57.4	82	7	1	1	0	0	0	1	146	85	5
558	1	74	1	2	1	152	53	79	3	1	1	0	0	0	1	115	73	5
559	1	74	1	3	1	166	65	88	7	1	0	0	0	0	1	122	72	6
560	1	74	1	3	1	165	65.5	81.3	7	1	0	0	0	0	1	143	93	5
561	1	74	1	3	1	169	66	83	7	1	1	0	0	0	1	129	77	5
562	1	74	1	4	1	159.5	52.5	73.5	7	1	0	0	0	0	0	137	80	6
563	1	74	1	4	1	171	70	82	0	1	0	1	0	0	1	131	80	4
564	1	74	1	1	1	166.9	73	99	7	1	1	0	0	0	1	133	85	3
565	1	74	1	3	1	175	82	97.5	3	1	1	0	0	0	1	129	75	3
566	1	74	1	3	1	169.5	65.4	83	7	1	1	1	0	0	1	145	79	4
567	1	74	1	4	1	177	81	90	7	1	1	0	1	0	1	137	73	3
568	1	74	1	2	1	164.5	59.8	76	3	1	0	0	0	0	1	171	86	6
569	1	74	1	2	1	167.5	79.5	97	7	1	0	0	0	0	1	112	71	4
570	1	74	1	3	1	161	66	76	3	1	0	0	1	0	1	130	82	5
571	1	74	1	3	1	161.4	65.1	87	0	1	0	0	0	0	1	132	71	4
572	1	74	1	2	1	160	54	90	3	1	0	0	0	0	1	140	88	5
573	1	74	1	2	1	175	75	76	0	1	0	0	1	0	1	125	72	4
574	1	74	1	2	1	165	74	95	7	1	0	1	0	1	1	119	73	3
575	1	74	1	2	1	163	64	82	0	1	0	0	1	0	1	131	80	4
576	1	74	1	2	1	171	66	83	7	1	0	0	0	0	1	135	84	6
577	1	74	1	2	1	172	61.2	79	1	1	0	0	0	0	1	133	78	5
578	1	74	1	2	1	166	66.3	82	0	1	1	0	0	0	1	137	76	3
579	1	73	1	4	1	165.5	58.2	74	3	1	0	0	0	0	1	133	82	6
580	1	73	1	3	1	167	77.2	93	3	1	1	0	0	0	1	149	72	3
581	1	73	1	3	1	170	66	80	7	1	0	0	0	0	1	131	87	6
582	1	73	1	4	1	171	80.5	80	0	1	0	0	0	1	1	131	76	4
583	1	73	1	2	1	174	77	100	7	1	1	0	0	0	1	121	71	3
584	1	73	1	1	1	165	64	78	0	1	0	0	0	0	0	125	75	5
585	1	73	1	2	1	172	72.2	82	7	1	1	0	1	0	1	131	82	4
586	1	73	1	1	1	161	60.4	84	7	1	0	0	0	1	1	133	79	6
587	1	73	1	3	1	170.1	77	89	7	1	0	0	0	0	1	131	71	5
588	1	73	1	3	1	159	67	93	7	1	0	0	1	0	1	160	75	4
589	1	73	1	2	1	157	67	95	3	1	0	0	0	0	1	131	88	4
590	1	73	1	1	1	158	59.4	82.5	7	1	0	0	1	0	1	105	70	6
591	1	73	1	2	1	158	66.5	96	7	1	1	0	0	0	1	141	90	3
592	1	73	1	2	1	168	73.6	85	0	1	0	0	0	0	1	137	80	4
593	1	73	1	1	1	160.5	71.5	98	7	1	0	0	0	0	1	120	86	4
594	1	73	1	3	1	162	63.7	85	7	1	0	0	1	1	1	120	70	5
595	1	73	1	3	1	166.5	72.7	93	7	1	0	1	1	0	1	163	85	3
596	1	73	1	3	1	180.5	87.2	103.5	3	1	0	0	0	0	1	152	91	4
597	1	73	1	1	1	155	40	74	0	1	0	0	0	0	1	131	72	4
598	1	73	1	1	1	165.1	66.8	98.9	1	1	1	0	1	0	1	145	61	2
599	1	73	1	2	1	168	63	74	3	1	0	0	0	0	1	120	70	6
600	1	73	1	2	1	168	63.2	83	0	1	0	0	1	0	1	135	75	5
601	1	73	1	4	1	166	61	85	7	1	1	0	1	0	1	116	62	5
602	1	73	1	2	1	167	68.3	79	7	1	1	1	0	0	1	150	79	3
603	1	73	1	2	1	172	58.8	78	3	1	0	0	0	0	1	114	63	6
604	1	72	1	2	1	160.5	65	86	3	1	1	0	0	0	1	118	78	4
605	1	72	1	1	1	164.5	83.5	104	7	1	1	0	1	0	1	154	94	3
606	1	72	1	3	1	159	64.1	89	3	1	0	0	0	0	1	129	83	5
607	1	72	1	2	1	165.5	58.4	87	7	1	1	0	0	0	1	161	99	5
608	1	72	1	4	1	167	73	95	7	1	0	0	0	0	1	117	85	4
609	1	72	1	2	1	152.5	60	84	0	1	1	0	0	0	1	117	72	3
610	1	72	1	2	1	163	53.9	75	7	1	1	1	0	1	1	119	70	4
611	1	72	1	4	1	163	75.1	94	1	1	0	1	0	0	1	118	69	2
612	1	72	1	3	1	165	61.4	80	7	1	0	0	1	0	1	130	80	6
613	1	72	1	3	1	172	78	80	0	1	0	0	0	0	1	127	81	4
614	1	72	1	2	1	168	65	83	3	1	1	0	0	0	1	130	82	5
615	1	72	1	4	1	174	85.3	93	3	0	0	0	1	0	1	150	84	3
616	1	72	1	4	1	164.5	69.3	90	7	1	1	0	1	0	1	137	87	3
617	1	72	1	3	1	160	63.2	92	0	1	0	0	1	0	1	115	69	3
618	1	72	1	2	1	163	60	87	7	1	0	0	0	0	1	129	73	6
619	1	72	1	1	1	163	67.1	98	7	1	1	0	0	1	0	141	90	3
620	1	72	1	4	1	162	55	81	7	1	1	1	1	0	1	142	80	4
621	1	72	1	2	1	173	73	85	7	1	0	0	0	0	1	120	73	5
622	1	72	1	3	1	171	65.4	80	7	1	0	0	0	0	1	133	65	6
623	1	72	1	3	1	165.5	63.2	86	7	1	0	0	0	0	0	148	82	6
624	1	72	1	3	1	166	82.2	96	7	1	0	0	1	0	1	138	86	4
625	1	72	1	3	1	180	82.5	89	3	1	1	0	0	1	1	147	85	4
626	1	72	1	3	1	161	81	86	7	1	1	0	0	1	1	123	73	4
627	1	72	1	3	1	172	65	88	7	1	0	1	0	0	1	135	85	5
628	1	72	1	1	1	173	68	80	3	1	1	1	0	0	1	122	84	4
629	1	72	1	3	1	160	69	85	7	1	0	0	1	0	1	150	90	5
630	1	72	1	2	1	166	60.5	78	0	1	1	1	0	0	1	124	79	3
631	1	71	1	2	1	171.5	78	89	0	1	0	0	0	0	1	132	85	4
632	1	71	1	1	1	171	77.5	100	0	1	0	0	0	0	1	129	77	3
633	1	71	1	2	1	160.4	55.6	88	0	1	0	0	0	0	1	151	95	5
634	1	71	1	2	1	170	63	82	7	1	0	0	1	0	1	111	76	6
635	1	71	1	4	1	168	78.4	88	7	1	0	1	0	0	1	141	88	4
636	1	71	1	1	1	163	70	72	0	1	0	0	1	0	1	123	73	4
637	1	71	1	2	1	167.5	70	95	3	1	0	0	0	0	1	133	73	4
638	1	71	1	4	1	167.5	54.1	76	7	1	1	1	0	0	1	143	77	4
639	1	71	1	3	1	175	69	87	1	1	1	0	0	0	0	143	89	4
640	1	71	1	3	1	155.5	55.6	76	7	1	0	0	0	0	1	147	67	6
641	1	71	1	1	1	165	62	78	0	1	0	0	0	0	1	130	75	5
642	1	71	1	4	1	170	70.2	87	1	1	0	0	0	0	1	150	83	4
643	1	71	1	3	2	168	56	80	3	1	1	0	0	0	1	134	76	5
644	1	71	1	4	1	154	58.4	87.5	7	1	0	0	0	0	1	130	87	5
645	1	71	1	2	1	173	63	82	7	1	0	1	0	0	1	133	76	5
646	1	71	1	3	1	164.5	73.7	94	7	1	0	0	0	0	1	121	75	4
647	1	71	1	2	1	164	60	80	7	1	0	0	1	0	1	128	78	6
648	1	71	1	3	1	163	69.2	91	7	1	0	1	0	0	1	122	77	3
649	1	71	1	4	1	163.6	62.5	81	0	1	0	0	1	0	1	121	70	5
650	1	71	1	3	1	163	72.5	90	7	1	1	1	0	0	0	139	83	2
651	1	71	1	2	1	163	63.8	85	3	1	0	0	1	0	1	137	79	5
652	1	71	1	3	1	163.5	71.2	86	0	1	0	0	0	0	1	166	92	4
653	1	71	1	2	1	161	60.5	85	7	1	0	0	0	0	1	136	90	6
654	1	71	1	4	1	165	64	83	7	1	0	0	0	1	1	126	79	6
655	1	71	1	2	1	162	59.7	80	0	1	1	0	0	0	1	122	65	4
656	1	71	1	3	1	166	65	83	7	1	0	0	1	0	1	133	77	6
657	1	71	1	2	1	157.1	65.8	96	7	1	0	0	0	1	1	133	82	4
658	1	71	1	3	1	165	75.5	84	7	1	0	0	0	0	1	122	79	5
659	1	71	1	3	1	172	72.5	82.5	0	1	0	0	0	1	1	126	87	4
660	1	70	1	2	1	176.5	81	96	3	1	0	0	0	0	1	120	77	4
661	1	70	1	3	1	170.5	80.9	90	7	1	0	0	1	0	1	139	86	4
662	1	70	1	2	1	164	64	72	7	1	0	0	0	0	1	124	69	6
663	1	70	1	3	1	166	60	82	0	1	0	0	0	0	1	120	80	5
664	1	70	1	2	2	151.9	77	98	7	0	1	0	1	0	1	133	81	2
665	1	70	1	3	1	178	80	88	7	1	0	0	0	0	1	132	70	5
666	1	70	1	2	1	174.5	80.8	92	7	1	0	0	0	0	1	125	85	4
667	1	70	1	2	1	173	75	91	7	1	0	0	0	0	1	135	77	4
668	1	70	1	3	1	165	55	80	1	1	0	0	1	0	1	129	80	5
669	1	70	1	3	1	159.5	64.5	90	0	0	1	1	0	0	1	161	74	0
670	1	70	1	2	1	158	74.7	94	7	1	0	0	0	0	1	153	83	4
671	1	70	1	3	1	171	64.5	82	3	1	0	0	0	0	0	126	80	6
672	1	70	1	3	1	169.6	72	90	7	1	0	0	1	0	1	125	68	4
673	1	70	1	1	1	163.5	78.5	92	7	1	0	0	0	0	1	140	87	4
674	1	70	1	2	1	163.6	56.3	79	7	1	0	0	0	0	1	140	80	6
675	1	70	1	2	1	161	68.2	94	7	1	0	0	0	0	1	123	80	4
676	1	70	1	4	1	159.9	55.8	85	7	1	1	0	1	1	1	116	88	5
677	1	70	1	3	1	180.5	63.9	83	0	1	0	0	0	0	1	136	81	5
678	1	70	1	3	2	172	65.9	86	7	1	1	1	0	1	1	132	77	4
679	1	70	1	3	1	169.1	85.5	106	7	1	1	0	0	0	1	125	64	3
680	1	70	1	2	1	169	65.2	88	3	1	1	1	1	0	1	128	80	4
681	1	70	1	3	1	167	63	90	7	1	1	1	0	0	1	131	75	3
682	1	70	1	2	1	173	66	85	0	1	1	1	1	0	1	130	80	3
683	1	70	1	1	1	170	62	82	7	1	1	1	0	0	1	131	78	4
684	1	70	1	3	1	166.5	76	93	7	1	1	0	0	0	1	134	82	3
685	1	70	1	2	1	166	67	87	0	1	0	1	0	0	1	123	80	3
686	1	70	1	3	1	169	67	83	3	1	1	0	0	0	0	115	82	5
687	1	70	1	3	1	177.5	81	88	0	1	1	0	0	1	1	127	78	3
688	1	70	1	4	1	169	68	85	7	1	0	0	0	0	1	127	77	6
689	1	70	1	2	1	173	74	93	3	1	0	0	0	0	1	145	90	4
690	1	70	1	3	1	165	62	75	7	1	1	1	0	0	1	146	89	4
691	1	69	1	3	1	160.5	76	94	7	1	0	0	0	1	1	153	73	4
692	1	69	1	2	1	159	61.5	91	7	1	1	0	0	0	0	173	80	3
693	1	69	1	4	1	170	74	85	7	1	0	1	0	0	1	143	86	4
694	1	69	1	2	1	170	68	91	7	1	0	1	0	0	1	125	83	4
695	1	69	1	3	1	162	66	88	1	1	1	0	0	0	1	139	61	3
696	1	69	1	3	1	167	62	82	3	1	0	0	0	0	1	129	78	6
697	1	69	1	2	1	174.5	80.4	98	3	1	1	1	0	0	1	135	92	2
698	1	69	1	2	1	164	67	85	7	1	0	0	0	0	1	133	85	5
699	1	69	1	3	1	170.5	59.3	75	7	1	1	0	0	1	1	104	59	5
700	1	69	1	2	2	164	60.5	78	3	1	0	0	1	0	1	126	76	6
701	1	69	1	2	1	175	61	80	7	1	1	1	1	0	1	101	64	4
702	1	69	1	2	1	168.5	70	91	0	1	0	0	1	0	1	152	94	3
703	1	69	1	1	1	169	76	94	7	1	0	0	1	0	1	137	72	4
704	1	69	1	3	1	167.5	61.5	78	3	1	1	0	1	1	1	130	79	5
705	1	69	1	1	1	165	70	90	7	1	0	0	0	0	0	109	68	4
706	1	69	1	2	1	154.5	61	83	1	1	0	0	0	0	1	139	86	4
707	1	69	1	3	1	164	62	86	0	1	0	0	0	0	1	138	84	5
708	1	69	1	3	1	174	72	82	7	1	0	0	0	0	1	120	70	6
709	1	69	1	3	1	160	63.7	78	7	1	0	1	0	0	1	117	69	4
710	1	69	1	1	1	166.9	67.8	91	7	1	0	0	0	0	1	129	89	4
711	1	69	1	2	1	171.7	85.1	94	3	1	0	0	1	1	1	159	100	4
712	1	69	1	3	1	164	64	80	3	1	0	0	0	0	1	131	80	6
713	1	69	1	3	1	160.5	57.1	83	7	1	0	0	1	1	1	123	77	6
714	1	69	1	2	1	170.5	67.1	75	7	1	0	0	0	0	1	143	77	6
715	1	69	1	2	1	164.5	66.6	82	0	1	1	0	0	0	1	120	78	3
716	1	69	1	3	1	155.5	56.3	78	1	1	1	1	1	0	1	142	84	3
717	1	69	1	3	1	153	50.3	79	0	1	0	0	0	1	1	159	92	5
718	1	69	1	2	1	167.5	74.9	90	0	1	1	1	1	0	1	122	65	1
719	1	69	1	1	1	174	85	93	1	1	0	0	1	0	1	122	84	3
720	1	69	1	4	1	172	68	80	0	1	0	0	0	0	0	110	70	5
721	1	69	1	3	1	170	80	96	7	1	1	0	0	1	1	137	87	3
722	1	69	1	2	1	167	60	82	3	1	1	1	0	0	1	124	69	4
723	1	69	1	2	1	168	62.5	80	7	1	0	0	1	0	1	131	85	6
724	1	69	1	3	1	166	64.4	68	7	1	0	0	0	0	1	153	74	6
725	1	69	1	2	1	163	62.5	85	0	1	1	0	1	0	1	131	72	4
726	1	69	1	3	1	157.5	70.7	92	7	1	0	0	0	1	1	124	81	4
727	1	69	1	4	1	169	70	90	7	1	1	0	0	0	0	111	71	3
728	1	69	1	1	1	160	61	80	7	1	0	0	0	0	1	132	77	6
729	1	69	1	1	1	167.5	83.3	98	1	1	1	0	0	0	1	111	62	2
730	1	68	1	3	1	172	70.5	85	7	1	0	0	0	0	1	121	71	6
731	1	68	1	2	1	170	62	90	7	1	1	0	0	0	1	140	90	4
732	1	68	1	3	1	162.6	47	73	7	1	0	0	0	0	1	132	80	5
733	1	68	1	3	1	165.5	63.1	85	1	1	1	1	1	0	1	128	66	3
734	1	68	1	3	1	166.1	85.2	102	0	1	1	1	0	1	1	130	86	1
735	1	68	1	4	1	160	56	75	7	1	0	0	0	0	1	129	71	6
736	1	68	1	3	1	164.5	71.5	88	7	1	0	0	1	0	0	123	80	5
737	1	68	1	3	1	156	55.2	86	3	1	1	0	0	0	1	133	74	5
738	1	68	1	4	1	170	72.3	80	7	1	0	0	0	0	1	128	80	5
739	1	68	1	3	1	168	70	85	7	1	0	0	0	0	1	129	69	5
740	1	68	1	3	1	167.5	70.4	86	7	1	0	0	0	0	1	138	86	5
741	1	68	1	3	1	164.7	64	75	7	1	0	0	0	0	1	119	68	6
742	1	68	1	3	1	178	79.9	90	7	1	1	1	0	0	1	133	67	2
743	1	68	1	3	1	165	70	82	0	1	0	0	0	0	1	133	77	4
744	1	68	1	2	1	170	88	90	3	1	0	0	1	0	1	123	75	4
745	1	68	1	4	1	170	62.5	80	0	1	0	0	0	0	1	111	71	5
746	1	68	1	2	1	170	63.8	77	7	1	0	0	0	0	1	147	88	6
747	1	68	1	2	1	171	78	87	3	1	1	0	0	0	0	133	82	4
748	1	68	1	2	1	177	67.7	80	3	1	0	1	0	1	1	169	82	5
749	1	68	1	5	1	163	70.1	92	7	1	1	0	1	0	1	121	79	3
750	1	68	1	4	1	164	61.3	79	7	1	0	0	0	1	1	162	84	6
751	1	68	1	3	1	172.4	79.2	97	7	1	1	1	1	0	1	134	80	2
752	1	68	1	3	1	172	64	82	7	1	0	0	1	0	1	121	71	6
753	1	68	1	2	1	174	87	100	7	1	0	0	0	1	1	132	88	4
754	1	67	1	2	1	165	62.4	81	0	1	1	0	0	0	1	129	74	4
755	1	67	1	3	1	162	65	81	7	1	0	0	0	0	1	131	82	5
756	1	67	1	3	1	173	71	82	3	1	1	1	0	0	1	123	68	4
757	1	67	1	4	1	166	67.6	84	7	1	0	0	0	0	1	108	71	5
758	1	67	1	2	1	165	70	84	1	0	0	0	0	0	1	122	69	3
759	1	67	1	4	1	173	69.8	84	3	1	1	1	0	1	1	129	83	4
760	1	67	1	3	1	162	78.2	98	7	1	0	0	1	0	1	131	84	4
761	1	67	1	3	1	173	85	89	3	1	1	1	1	1	1	133	73	3
762	1	67	1	3	1	178	83	93	7	1	0	0	0	1	1	120	69	4
763	1	67	1	2	1	165	49	82	0	1	0	0	1	0	1	127	78	4
764	1	67	1	3	1	160	65.7	92	1	1	1	0	0	0	1	131	76	2
765	1	67	1	2	1	171	70	84	3	1	0	0	1	0	1	131	77	6
766	1	67	1	3	1	165	65	86	7	1	1	0	0	0	1	157	91	5
767	1	67	1	3	1	170	78.9	93	7	1	0	1	1	0	1	131	85	3
768	1	67	1	3	1	170	68	89	0	1	1	0	0	0	1	124	75	4
769	1	67	1	3	1	165	62	87	0	1	1	0	0	0	1	130	76	4
770	1	67	1	3	1	157.1	59	86	7	1	1	1	0	0	1	151	85	4
771	1	67	1	3	1	173	81	96	7	1	0	0	0	0	1	132	81	4
772	1	67	1	2	1	161	62	79	7	1	0	0	0	0	1	125	76	6
773	1	67	1	3	1	170	70	84	0	1	0	0	0	0	1	134	84	4
774	1	67	1	3	2	168.5	77.8	95	3	1	1	1	0	0	1	109	67	2
775	1	67	1	2	1	173	75	82	0	1	0	0	0	0	1	122	76	4
776	1	66	1	3	1	161.5	56.5	80	7	1	0	0	0	0	1	108	78	6
777	1	66	1	3	1	167	73.6	98	0	1	1	1	0	1	1	148	87	1
778	1	66	1	2	1	173.5	61.3	76	7	1	0	0	0	0	1	133	76	6
779	1	66	1	3	1	168	65.8	82	3	1	0	0	0	1	1	142	90	6
780	1	66	1	3	1	179.5	80.2	90	7	1	1	1	0	0	1	136	82	2
781	1	66	1	2	1	170	66	84	0	1	1	0	1	1	1	129	79	4
782	1	66	1	3	1	162	64.9	91	7	1	1	0	0	1	1	117	79	3
783	1	66	1	2	1	173	65.5	81	3	0	1	1	0	0	1	128	70	3
784	1	66	1	3	1	181.5	70.5	86	3	1	0	0	0	0	1	128	73	6
785	1	66	1	3	1	167.4	78.5	98	7	1	1	0	0	0	1	132	85	3
786	1	66	1	3	1	173	70	85.5	0	1	0	0	0	0	1	123	71	5
787	1	66	1	2	1	173	80	95	7	1	1	0	0	0	1	140	80	3
788	1	66	1	3	1	172.5	72	87	3	1	1	1	0	0	1	124	71	3
789	1	66	1	2	1	160	68	88	7	1	0	0	0	0	1	154	87	5
790	1	66	1	3	1	170	62	75	0	1	0	0	0	0	1	138	79	5
791	1	66	1	3	1	163.5	61.2	80	7	1	0	0	0	0	1	113	72	6
792	1	66	1	3	1	158	47.3	71	7	1	0	0	0	0	1	127	78	6
793	1	66	1	4	1	165	72.5	90	3	1	1	1	0	1	1	130	73	2
794	1	66	1	4	1	167	67.1	80	7	1	0	0	0	0	1	130	84	5
795	1	66	1	3	1	166	71	90	7	1	1	0	0	1	1	118	76	3
796	1	66	1	4	1	172	73	82	3	1	0	0	0	0	1	134	81	5
797	1	66	1	3	1	167.5	71.7	88	7	1	1	1	0	0	1	119	69	3
798	1	66	1	3	1	161.5	65.9	86	3	1	0	0	1	0	1	149	81	5
799	1	65	1	3	1	176	88	97	0	1	1	1	0	1	1	125	74	1
800	1	65	1	3	1	172.5	80.6	89	3	1	1	1	0	0	1	131	76	3
801	1	65	1	3	1	162.3	68.4	90	7	1	0	0	1	0	1	157	85	4
802	1	65	1	2	1	171	65	82	3	1	1	0	0	0	1	133	81	5
803	1	65	1	2	1	167	65	78	3	1	0	0	0	0	1	123	80	6
804	1	65	1	2	1	162	65	65.1	3	1	0	0	0	0	1	133	74	5
805	1	65	1	3	1	165	76.5	93.5	1	1	1	0	0	0	1	147	101	2
806	1	65	1	2	1	170.9	72.8	88	3	1	1	0	1	0	1	142	89	4
807	1	65	1	3	1	168	77.3	93	7	1	1	1	0	0	1	130	81	2
808	1	65	1	3	1	163	83.2	99	0	1	0	0	0	1	1	126	79	3
809	1	65	1	3	1	162	61	83	7	1	1	0	0	1	1	119	80	5
810	1	65	1	2	1	156	50	76	7	1	0	0	0	0	1	129	79	6
811	1	65	1	2	1	170	68	82	7	1	0	0	0	0	1	130	78	6
812	1	65	1	3	1	180.4	80.4	96	0	1	0	0	0	1	1	119	73	3
813	1	65	1	2	2	168	60	75	0	1	0	0	0	0	1	124	74	5
814	1	65	1	2	1	164	71.8	81.3	7	1	0	1	0	1	1	120	71	4
815	1	65	1	4	1	167.5	71.9	81	7	1	1	1	0	0	1	115	69	3
816	1	65	1	3	1	175	78.2	93	1	1	0	0	0	0	1	145	103	3
817	1	65	1	2	1	160.5	59	86	1	1	1	1	0	0	1	130	71	3
818	1	65	1	2	1	165	65	85	7	1	0	0	0	0	1	120	70	6
819	1	65	1	2	1	157.5	75.7	97	1	1	0	0	0	0	0	122	61	3
820	1	65	1	3	1	161.5	57	79	1	1	0	0	0	0	1	143	94	5
821	1	65	1	4	1	170.4	67.8	82	7	1	0	0	0	0	1	115	74	6
822	1	65	1	3	1	160	62	84	7	1	0	0	0	0	1	120	80	5
823	1	65	1	4	1	168	60	75	0	1	1	0	0	1	1	131	80	4
824	1	65	1	4	1	167	83.6	100	0	1	0	0	0	1	1	130	77	3
825	1	65	1	2	1	173.9	70	87	7	1	1	1	0	0	1	153	82	4
826	1	64	1	2	1	164	80.7	94	0	1	0	0	0	0	1	137	89	3
827	1	64	1	3	1	169	73.8	85	7	1	0	0	0	0	1	120	80	5
828	1	64	1	2	1	166	64	80	0	1	0	0	1	0	1	129	71	5
829	1	64	1	2	1	170.5	88.3	105	1	1	1	0	0	0	1	153	82	2
830	1	64	1	4	1	162.6	65.8	74	7	1	0	0	0	1	1	132	71	5
831	1	64	1	3	1	177.4	81.7	100	0	1	1	1	0	0	1	132	80	1
832	1	64	1	2	1	165	65	80	3	1	0	0	0	0	1	130	70	6
833	1	64	1	3	1	159.2	55.4	76.5	3	1	0	0	0	0	1	148	87	6
834	1	64	1	3	1	174.5	70	86	7	1	1	0	0	0	1	131	91	5
835	1	64	1	3	1	172	64	75	0	1	0	0	0	0	0	144	84	5
836	1	64	1	4	1	176	80	83	7	1	0	0	1	0	1	129	69	5
837	1	64	1	2	1	168	63	84	0	1	0	0	0	0	1	131	65	5
838	1	64	1	3	1	165	74	98	0	1	1	1	0	0	1	108	75	1
839	1	64	1	3	1	165	61	80	0	1	1	0	0	1	1	161	102	4
840	1	64	1	3	1	168.3	70.3	81	7	1	0	0	0	0	1	155	96	5
841	1	64	1	4	1	169	67	83	7	1	1	0	0	0	1	133	81	5
842	1	64	1	2	1	166	75	84	7	1	0	0	1	1	1	117	75	5
843	1	64	1	3	1	174	61	93	0	1	1	0	0	1	1	132	78	3
844	1	64	1	3	1	166	74.7	100	3	1	1	1	1	0	1	123	71	2
845	1	64	1	3	1	156	73	94	3	1	0	0	0	0	1	129	74	4
846	1	64	1	3	1	182	83	90	7	1	0	0	0	0	1	125	79	4
847	1	63	1	2	1	164	67.1	85	0	1	1	0	1	0	1	131	64	3
848	1	63	1	3	1	176.5	53.1	73	7	1	1	0	0	1	1	133	70	4
849	1	63	1	3	1	172	75.3	93	7	1	0	0	0	0	1	165	89	4
850	1	63	1	4	1	162	63	82	0	1	0	0	0	1	1	127	79	4
851	1	63	1	4	1	163	65	86	3	1	0	0	1	0	1	123	80	5
852	1	63	1	2	1	165	60	88	7	1	1	0	0	0	1	137	81	5
853	1	63	1	3	1	160	74	95	0	1	1	1	0	0	1	131	79	1
854	1	63	1	3	1	167	66.5	80	3	1	0	0	0	0	1	119	69	6
855	1	63	1	3	1	165	66.2	91	7	1	0	1	0	0	1	119	69	3
856	1	63	1	3	1	171	78	85	7	0	1	1	0	1	1	124	77	2
857	1	62	1	3	1	177	82	98	3	1	1	0	0	0	1	132	78	3
858	1	62	1	3	1	166	58	76	7	1	1	0	0	0	1	118	76	5
859	1	62	1	3	1	168	71	86	7	1	1	0	0	0	1	119	72	4
860	1	62	1	2	1	163	66	85	7	1	0	0	0	0	1	113	82	5
861	1	62	1	3	1	166	52.5	72	0	1	1	1	0	0	1	123	83	3
862	1	62	1	1	1	173.5	62.3	80	7	1	1	0	1	0	1	156	99	5
863	1	62	1	3	1	168	70	98	0	1	0	0	1	0	1	116	73	3
864	1	62	1	3	1	166	65.4	80	0	1	0	0	0	0	1	130	79	5
865	1	62	1	3	1	163.1	58.7	78	3	1	1	0	0	0	1	144	91	5
866	1	61	1	3	1	165.5	50.6	67.5	7	1	1	0	0	0	0	113	72	5
867	1	61	1	3	1	160	58	78	7	1	0	0	0	0	1	118	74	6
868	1	61	1	3	1	169	63	88	3	1	0	1	1	0	1	143	93	5
869	1	61	1	3	1	158	57	80	3	1	0	0	0	0	1	140	90	6
870	1	61	1	3	1	164	62.3	85	7	1	0	0	0	0	1	141	87	6
871	1	61	1	3	1	162	67.8	87	0	1	1	0	0	0	1	125	72	3
872	1	60	1	2	1	161.7	53.3	74.5	7	1	1	0	0	0	1	142	94	5
873	1	60	1	3	1	170	65	80	0	1	0	0	1	0	1	114	79	5
874	1	60	1	3	1	176	65	88	0	1	0	0	0	0	1	117	75	5
875	1	60	1	3	1	167	83	78	7	1	0	0	0	0	1	123	75	5
876	1	60	1	4	1	164	59.3	80	7	1	1	0	0	0	1	131	80	5
877	1	60	1	3	1	162	68	89	7	1	0	0	0	0	1	160	80	5
878	1	60	1	3	1	164.5	69	89	7	1	0	0	0	0	1	136	89	5
879	1	60	1	3	1	170	72	84	7	0	1	1	0	0	1	150	92	2
880	1	60	1	4	1	173	67.5	78	7	1	0	0	0	0	1	132	67	6
881	1	60	1	3	1	162	52	82	0	1	0	0	0	0	1	114	69	5
882	1	60	1	3	1	167.8	63.3	73	7	1	1	1	0	0	1	119	69	4
883	1	60	1	2	2	162	50	78	0	1	0	0	0	1	1	159	87	5
884	1	60	1	3	1	168	82	104	3	1	1	0	0	1	1	136	75	3
885	1	60	1	2	1	163	47.5	78	1	1	1	0	0	0	1	118	74	3
886	1	59	1	4	1	178	70	84	3	1	1	0	0	1	0	125	81	5
887	1	59	1	2	1	167	69	80	7	1	0	0	1	0	1	107	67	5
888	1	59	1	3	1	156.5	76.9	102	1	1	1	1	1	1	1	126	87	1
889	1	59	1	3	1	175	68	88	7	1	0	0	1	0	1	131	72	6
890	1	59	1	4	1	159	60.5	85	7	1	1	0	0	0	1	119	80	5
891	1	59	1	3	1	153.5	58.2	80	3	1	1	0	0	0	1	129	77	4
892	1	59	1	2	1	170	62	78	7	1	0	0	0	0	1	139	84	6
893	1	59	1	4	1	170	67	83	0	1	1	0	0	0	0	163	101	4
894	1	59	1	2	1	172	81.5	96	1	1	1	0	1	0	1	131	79	2
895	1	59	1	3	1	163	61.2	72	3	1	1	1	0	0	1	122	85	4
896	1	59	1	2	1	177.7	83	93	0	1	1	0	0	1	1	131	91	2
897	1	59	1	2	1	172	71.9	97	0	1	0	0	1	0	1	137	84	3
898	1	59	1	3	1	170	70	80	0	1	0	0	0	0	1	122	81	4
899	1	59	1	2	1	160	56	88	1	1	0	0	0	0	1	135	83	5
900	1	59	1	4	1	179	81.6	94	0	1	1	1	0	1	1	144	86	1
901	1	59	1	3	1	170	75	80	3	1	0	0	0	0	1	162	94	5
902	1	58	1	3	1	173	75	86	3	1	0	0	1	0	1	128	73	5
903	1	58	1	2	1	168	65	80	7	1	0	0	0	1	1	128	70	6
904	1	58	1	3	1	169	66.5	79	3	1	0	0	0	0	0	131	83	6
905	1	58	1	3	1	170	60	75	7	1	0	0	0	0	1	131	73	6
906	1	58	1	3	1	163	72	95	7	1	0	0	0	0	1	124	80	4
907	1	58	1	3	1	157	75	92	0	1	0	0	0	0	1	142	95	3
908	1	58	1	2	1	166	57	80	7	1	0	0	0	0	1	128	78	6
909	1	57	1	3	1	174	67.7	82	7	1	0	0	0	0	1	150	98	6
910	1	57	1	2	1	163	62.5	81	1	1	0	0	0	0	1	134	83	5
911	1	57	1	3	1	164	70	89	7	0	0	1	1	1	1	117	77	3
912	1	57	1	3	1	167	63.5	80	7	1	0	0	1	0	1	129	79	6
913	1	56	1	2	1	170.9	69.3	78	0	1	1	1	1	0	1	130	81	3
914	1	56	1	3	1	168.5	78	88	1	1	1	0	1	0	1	160	84	3
915	1	56	1	3	1	170.6	71.2	85	0	1	1	0	0	1	1	131	75	3
916	1	55	1	2	1	172	69	83	3	1	0	0	1	0	1	126	69	6
917	1	55	1	3	1	176.5	84.5	100	3	1	1	1	0	0	1	136	83	2
918	1	55	1	2	1	173	78	90	0	1	0	0	1	0	1	132	72	3
919	1	55	1	2	2	167	58	80	1	1	1	1	0	0	1	153	77	3
920	1	55	1	2	1	180.5	79.9	87	7	1	1	0	0	1	0	99	74	4
921	1	51	1	2	1	165.9	79.1	99	3	1	0	1	0	0	1	136	88	3
922	1	50	1	4	1	175.2	87.6	104	7	1	0	0	0	0	1	144	92	4
923	1	50	1	3	1	168	85	84	0	1	0	0	0	0	1	120	80	4
924	1	50	1	3	1	172	75.4	85	0	1	0	0	0	1	1	122	76	4
925	1	47	1	3	1	172	68	83	0	1	0	0	0	0	1	130	80	5
926	1	46	1	3	2	170	70	80	0	1	0	0	1	0	1	137	76	4
927	1	45	1	2	1	165	62	84	0	1	0	0	1	0	1	129	78	5
928	1	45	1	3	1	169.5	73.5	88	0	1	1	1	0	0	1	131	81	2
929	1	45	1	4	1	172	82	82	1	1	0	0	0	0	1	114	67	4
930	1	44	1	1	2	168	70	78	7	1	0	0	0	0	1	120	75	5
931	1	43	1	4	2	157	65	85	3	1	0	0	0	0	1	129	74	5
932	1	37	1	1	2	157.2	58.2	78	1	1	0	0	0	0	1	131	77	5
933	1	107	1	3	1	162	53.5	80	7	1	0	0	1	0	1	128	72	6
934	1	104	1	2	2	165	70	84	0	1	0	0	0	0	1	151	63	4
935	1	102	1	1	2	162	47	80	0	1	0	0	0	0	1	150	71	4
936	1	101	1	1	1	160	55	68	0	1	0	0	0	0	1	137	80	5
937	1	101	1	2	1	158	43.9	67	1	1	0	0	0	0	1	155	71	4
938	1	100	1	5	1	172	61	87	3	1	0	0	0	0	1	127	79	6
939	1	100	1	2	1	165	58	76	0	1	0	0	0	0	1	121	74	5
940	1	100	1	1	1	160	53	81	7	1	1	0	0	0	1	163	87	5
941	1	100	1	1	2	155	54.4	76	7	1	0	0	0	0	1	135	71	6
942	1	100	1	3	1	156.5	71.7	93	7	1	0	0	1	1	1	130	66	4
943	1	100	1	1	2	167.5	55	80	3	1	0	0	0	0	1	119	69	6
944	1	100	1	5	2	160	55	80	0	1	1	0	0	0	1	130	80	4
945	1	99	1	1	2	156	67	99	0	1	1	0	0	0	1	136	71	2
946	1	99	1	1	2	164.1	53.5	74	3	1	0	0	0	0	1	135	78	6
947	1	99	1	1	1	173	55.5	72	7	1	0	0	0	0	1	117	75	6
948	1	99	1	3	1	160	55	81	7	1	1	0	0	0	0	106	67	5
949	1	99	1	2	1	168	67	89	0	1	0	0	0	0	1	153	72	5
950	1	99	1	1	1	156	50	78	0	1	0	0	0	0	0	121	71	5
951	1	99	1	1	1	165	56	88	0	1	0	0	1	0	1	113	60	5
952	1	99	1	1	1	152	50	86	7	1	0	0	0	0	1	131	64	6
953	1	98	1	4	1	173	67	80	1	1	0	0	0	0	1	130	75	5
954	1	98	1	1	2	160	62	70	0	1	0	0	0	0	1	129	83	4
955	1	98	1	4	1	158	58.1	84	7	1	0	0	1	0	1	130	65	6
956	1	98	1	4	1	163	52	75	7	1	0	0	1	0	1	131	77	6
957	1	98	1	3	2	157	60.2	91	7	1	0	0	0	0	1	153	73	4
958	1	98	1	3	1	160	60	85	7	1	0	1	0	0	0	132	78	5
959	1	98	1	1	1	158.5	49.1	78	7	1	0	0	0	0	1	135	74	6
960	1	97	1	2	1	158.4	53.6	80	7	1	0	0	1	0	1	128	76	6
961	1	97	1	1	2	168	62.5	78	0	1	0	0	0	0	1	128	69	5
962	1	97	1	1	1	163.6	70.5	99	1	1	0	0	0	0	1	154	89	3
963	1	97	1	2	1	168	57	76	0	1	0	0	1	0	0	115	73	5
964	1	97	1	1	2	152	55	96	7	1	0	0	1	0	1	149	72	5
965	1	97	1	2	2	152	39	78	0	1	1	0	0	1	1	125	69	3
966	1	97	1	4	1	160	60	90	0	0	0	0	1	0	1	157	77	3
967	1	97	1	3	2	160	50	78	0	1	0	0	1	0	1	125	80	5
968	1	97	1	1	1	154	52.5	77	7	1	0	0	0	0	1	142	78	6
969	1	97	1	1	1	164	63.2	83	3	1	1	1	0	0	1	134	83	4
970	1	97	1	1	1	157.5	53.2	67	0	1	0	0	1	0	1	111	74	5
971	1	97	1	2	1	162	59	80	7	1	0	0	0	0	1	140	85	6
972	1	96	1	1	1	162	58.5	79	0	1	0	0	0	0	1	129	78	5
973	1	96	1	1	1	155.5	54.1	85	0	1	0	0	0	0	1	144	87	5
974	1	96	1	1	1	155	57.3	83	0	1	0	0	0	0	1	130	80	5
975	1	96	1	1	1	160	60	76	0	1	0	0	1	0	1	131	74	5
976	1	96	1	1	1	156	56.5	88.5	7	1	1	0	0	0	1	119	68	5
977	1	96	1	2	1	170	72	80	0	1	0	0	1	1	1	120	81	4
978	1	96	1	1	1	150	60	90	0	1	1	1	0	0	1	133	70	1
979	1	96	1	2	2	166	57	85	0	1	0	0	0	0	1	125	77	5
980	1	96	1	1	1	172	60	87	0	1	0	0	0	0	1	135	74	5
981	1	96	1	1	2	164	63	74	7	1	1	0	1	0	1	122	82	5
982	1	96	1	1	2	161.4	51.2	73	7	1	0	0	0	0	1	123	65	6
983	1	96	1	2	1	173	69	93	0	1	1	0	0	0	1	155	66	3
984	1	95	1	1	1	167	65	78	1	1	0	0	0	0	1	127	75	5
985	1	95	1	1	2	165	65	85	0	1	0	0	0	0	1	121	77	5
986	1	95	1	1	1	162	52	76	7	1	0	0	0	0	1	130	75	6
987	1	95	1	2	2	165	67	90	0	1	0	0	1	0	1	131	70	3
988	1	95	1	2	1	173	56	74	0	1	0	0	0	0	1	136	64	5
989	1	95	1	3	2	153	51	91	7	1	0	0	0	0	1	168	77	5
990	1	95	1	3	1	172	77	106	0	1	0	0	1	0	1	139	72	3
991	1	95	1	1	1	162	51	80	7	1	1	0	0	0	1	129	78	5
992	1	95	1	2	1	156	60.5	90	0	1	0	0	0	0	1	131	79	3
993	1	95	1	1	1	175	58.5	85	0	1	1	0	0	1	1	131	79	4
994	1	95	1	1	1	160.3	67.3	103	7	1	0	0	1	0	1	163	72	4
995	1	95	1	1	1	158.5	64.7	91	7	0	0	1	0	0	1	115	78	2
996	1	95	1	1	1	162	62	92	0	1	0	0	0	0	1	133	77	4
997	1	95	1	2	2	170.3	66.3	94	0	1	0	0	0	0	1	144	83	4
998	1	95	1	1	1	155.5	60.8	90	0	1	1	0	0	1	1	130	72	2
999	1	95	1	1	1	150	47	80	0	1	0	0	0	0	1	125	70	5
1000	1	95	1	4	1	168	68	82	3	1	1	0	0	0	1	141	66	4
1001	1	95	1	1	1	152	42	66	7	1	0	0	0	0	1	136	82	5
1002	1	95	1	1	2	159	53.6	79.8	0	1	0	0	0	0	1	173	89	5
1003	1	95	1	3	1	159.9	71.8	97	0	1	1	0	0	0	1	132	81	2
1004	1	95	1	1	2	175	62	85	0	0	0	0	0	0	0	163	93	4
1005	1	95	1	1	1	166	70.5	102	0	1	0	0	0	0	0	160	96	3
1006	1	95	1	2	1	170	65	80	0	1	1	0	0	0	1	127	81	4
1007	1	95	1	1	1	160	57.5	82	3	1	0	0	0	0	1	141	87	6
1008	1	94	1	3	1	160	53	73	0	1	0	0	1	0	1	111	66	5
1009	1	94	1	3	1	170	68	75	7	1	0	0	1	0	1	133	83	6
1010	1	94	1	1	1	165	68	93	7	1	0	1	0	0	1	165	78	3
1011	1	94	1	3	1	163.9	68.6	88	0	1	0	0	0	0	1	143	76	4
1012	1	94	1	2	1	159.5	46	73	7	1	0	0	0	0	1	117	75	5
1013	1	94	1	1	1	162	52.3	79	7	1	1	0	0	0	1	128	79	5
1014	1	94	1	1	1	160	46.1	84	3	1	0	0	0	1	1	136	82	5
1015	1	94	1	1	1	164	55	74	0	1	0	0	0	0	1	137	75	5
1016	1	94	1	2	1	158.2	56.5	83.6	7	1	0	1	0	0	1	172	71	5
1017	1	94	1	1	1	165	59	80	0	1	0	0	1	0	1	132	73	5
1018	1	94	1	2	1	169.9	73.1	100	7	1	0	0	0	0	1	162	91	4
1019	1	94	1	1	1	154.3	48.3	85	0	1	0	0	0	0	0	139	91	5
1020	1	94	1	2	2	166.5	80.8	95	0	1	0	0	0	0	1	175	73	3
1021	1	94	1	2	1	159	59.8	83	1	1	0	1	0	0	1	144	80	4
1022	1	94	1	1	1	162	52	83	0	1	0	0	0	0	0	142	81	5
1023	1	94	1	1	2	164.8	70.8	93	7	1	0	0	0	0	0	146	73	4
1024	1	94	1	1	1	166	64	80	1	1	0	0	0	0	1	130	71	5
1025	1	94	1	1	1	158.4	38.7	74	1	1	0	0	0	0	1	130	72	4
1026	1	94	1	1	2	157	65	87	0	1	0	0	0	0	1	161	79	4
1027	1	94	1	1	1	170	60	81	0	1	0	0	1	0	1	133	83	5
1028	1	94	1	1	2	158	50	74	7	1	0	0	0	0	1	143	80	6
1029	1	94	1	2	1	171.3	72.7	102	0	1	0	0	0	0	0	126	70	3
1030	1	94	1	2	1	168	66	87	7	1	0	0	1	0	1	146	66	6
1031	1	94	1	1	1	167	60.2	75	0	1	1	0	1	1	1	143	79	4
1032	1	94	1	2	1	173	63	68	0	1	1	0	0	0	1	154	61	4
1033	1	94	1	1	2	166	50	75	0	1	0	0	0	0	1	124	83	4
1034	1	94	1	1	1	150.4	48	80	7	1	0	0	0	0	1	132	70	6
1035	1	94	1	1	1	162.7	58.3	80	7	1	0	1	1	0	1	154	88	5
1036	1	94	1	1	2	170	60	72	0	0	0	0	1	0	1	145	97	4
1037	1	94	1	1	1	157.1	61.3	95	0	1	0	0	0	0	1	152	83	3
1038	1	93	1	3	2	153	62	88	0	1	0	0	0	0	1	129	70	4
1039	1	93	1	1	1	164	71	80	0	1	0	0	0	0	1	127	69	4
1040	1	93	1	1	2	169	75	90	7	0	1	1	0	0	1	120	70	1
1041	1	93	1	1	2	155	53	82	0	1	0	0	1	0	1	136	80	5
1042	1	93	1	1	1	168.2	61.9	77	7	1	0	0	1	0	1	165	83	6
1043	1	93	1	3	1	169	54	72	7	1	0	0	0	0	1	119	69	6
1044	1	93	1	1	2	163	50	67.8	7	1	1	1	0	0	1	130	70	4
1045	1	93	1	2	1	165	60.2	90	0	1	0	0	1	0	1	144	70	4
1046	1	93	1	3	2	166.8	66.2	94	0	1	0	0	0	0	1	154	78	4
1047	1	93	1	3	1	163	53	70	7	1	0	0	0	0	1	123	87	6
1048	1	93	1	1	2	161.3	55.9	78	7	1	1	0	0	0	1	159	62	5
1049	1	93	1	2	2	170	64	80	0	1	0	0	0	0	1	137	79	5
1050	1	93	1	1	2	168	54	78	0	1	0	0	0	0	1	137	61	5
1051	1	93	1	4	1	163	67	88	0	1	0	0	0	0	1	118	74	4
1052	1	93	1	3	1	170	68	83	7	1	0	0	0	1	1	133	80	6
1053	1	93	1	2	1	154	56	83	1	1	0	0	1	0	1	129	74	5
1054	1	93	1	1	2	161	62	72	1	1	0	0	1	0	1	131	81	5
1055	1	93	1	3	1	167.5	62	85	7	1	0	0	0	0	1	131	77	6
1056	1	93	1	2	1	160	48.7	80	7	1	0	0	1	0	1	137	74	6
1057	1	93	1	5	1	159	56	68	7	1	0	0	0	0	1	111	69	6
1058	1	93	1	2	1	156	48	80	0	1	0	0	0	0	1	120	74	5
1059	1	93	1	2	1	168	75.5	84	0	1	0	0	0	0	1	128	83	4
1060	1	93	1	1	1	161	59	76	0	1	0	0	1	0	1	116	72	5
1061	1	93	1	2	1	158	75.2	95	7	1	0	0	0	0	1	171	85	4
1062	1	93	1	2	1	170	72	105	0	1	0	0	1	0	1	141	67	3
1063	1	93	1	1	2	158	62	90	0	1	0	0	0	0	1	135	84	3
1064	1	93	1	2	1	162	70	90	0	1	1	0	0	0	1	162	72	2
1065	1	93	1	1	1	158	43.6	68	7	1	0	0	0	0	1	128	75	5
1066	1	93	1	2	1	154	61	91	3	1	0	0	0	0	1	137	79	4
1067	1	93	1	1	1	163.5	56.4	84	7	1	0	0	0	0	0	163	65	6
1068	1	93	1	3	1	153.5	48	87	7	1	0	0	0	0	1	114	73	6
1069	1	93	1	3	1	160	45	76	7	1	0	0	0	0	1	125	80	5
1070	1	93	1	2	1	165	52	82	7	1	0	0	0	0	1	110	63	6
1071	1	92	1	4	1	165	51	80	3	1	1	0	0	0	1	125	74	5
1072	1	92	1	2	2	166	68	90	0	1	1	0	1	0	1	131	77	2
1073	1	92	1	2	1	156	55.5	92	7	1	0	0	1	1	1	177	79	5
1074	1	92	1	1	1	164	50	84	3	1	0	0	0	0	1	133	83	6
1075	1	92	1	1	1	165.6	78.8	103	7	1	0	0	0	0	1	136	58	4
1076	1	92	1	4	1	163.5	62	80	7	1	0	0	0	0	1	136	79	6
1077	1	92	1	1	1	160	62	78	0	1	0	0	1	0	1	123	75	4
1078	1	92	1	2	1	155	54	79	0	1	0	0	1	0	1	160	82	5
1079	1	92	1	1	1	158	67.9	84	7	1	0	0	0	0	1	136	78	5
1080	1	92	1	2	1	158	56	80	0	1	0	0	0	0	1	136	82	5
1081	1	92	1	3	1	162	60	87	7	1	0	0	0	0	1	161	74	6
1082	1	92	1	1	1	168	56	78	0	1	0	0	1	0	1	122	69	5
1083	1	92	1	2	1	164	69	93	7	1	0	0	1	0	1	166	67	4
1084	1	92	1	2	1	168	70	101	0	1	0	0	0	0	1	134	101	3
1085	1	92	1	1	1	166	60	86	0	1	0	0	1	0	1	119	64	5
1086	1	92	1	2	1	160	70	90	7	1	0	0	1	0	1	113	72	4
1087	1	92	1	3	1	157	53.7	80	7	0	0	0	0	0	1	151	69	5
1088	1	92	1	2	2	163	64	78	0	1	0	0	0	0	1	134	70	4
1089	1	92	1	1	1	161	65	72	0	1	0	1	1	0	1	133	71	3
1090	1	92	1	1	1	151.5	60.2	90	0	1	0	0	1	0	1	127	79	3
1091	1	92	1	3	1	156	57.5	90	7	1	0	0	0	0	1	149	81	5
1092	1	92	1	1	1	152	70	89	0	1	0	0	0	0	1	110	79	4
1093	1	92	1	1	2	167	69	90	7	1	0	0	0	0	1	138	77	4
1094	1	92	1	2	1	165	62	82	0	1	0	0	1	0	1	128	78	5
1095	1	92	1	2	1	157.5	74	100	7	1	0	0	0	0	1	135	63	4
1096	1	92	1	1	1	165	59	78	7	1	1	0	0	0	1	114	72	5
1097	1	92	1	1	1	166.5	50.7	75	0	1	0	0	0	0	1	149	77	4
1098	1	92	1	1	2	173	72.5	89	7	1	0	0	1	1	1	138	88	5
1099	1	92	1	3	1	158	50	80	3	1	1	0	0	1	1	139	85	5
1100	1	92	1	2	1	152	53	87	0	1	0	0	0	0	1	121	81	5
1101	1	92	1	1	1	155.5	70	99	7	1	0	0	1	0	1	137	87	4
1102	1	92	1	2	1	163	66.2	78	0	1	0	0	1	0	0	124	75	4
1103	1	92	1	1	1	154	62	96	7	1	1	0	1	1	1	141	81	3
1104	1	92	1	3	2	165	62.5	82	0	1	0	0	0	1	1	131	71	5
1105	1	92	1	2	1	172	63	96	3	1	1	1	0	0	1	133	75	3
1106	1	92	1	1	1	164	60	90	0	1	0	0	0	0	1	127	79	4
1107	1	92	1	3	1	163	62	95	1	1	0	0	0	0	1	117	65	4
1108	1	92	1	1	1	156.7	54.9	87	3	1	0	0	0	0	1	152	73	6
1109	1	92	1	2	1	159.2	59.6	86	0	1	0	0	0	0	1	112	65	5
1110	1	92	1	2	1	150	55	94.5	7	1	1	0	0	0	1	128	75	3
1111	1	92	1	1	1	158	60	89	7	1	1	0	0	0	1	137	72	4
1112	1	92	1	2	1	165	59.1	72	0	1	1	1	0	0	1	130	75	3
1113	1	92	1	4	1	161.5	66.7	91	7	1	0	0	1	0	1	151	73	4
1114	1	92	1	2	1	160	62	84	3	1	0	0	0	0	1	137	82	5
1115	1	92	1	3	1	154.9	56.9	88	7	1	0	0	0	0	1	118	72	6
1116	1	92	1	3	1	156	46.5	72	0	1	0	0	1	0	1	131	63	5
1117	1	92	1	2	1	152	48.4	74	0	1	0	0	0	0	1	138	87	5
1118	1	92	1	2	1	156	56.7	86	7	1	0	0	0	0	1	149	77	6
1119	1	91	1	1	2	152	53	78	7	1	1	1	0	0	1	137	72	4
1120	1	91	1	2	2	160	52	87	7	1	0	0	1	0	1	143	81	6
1121	1	91	1	1	1	162	60.1	85	7	1	0	1	0	0	1	131	71	5
1122	1	91	1	3	1	167.2	51.5	80	7	1	0	0	1	0	1	169	89	5
1123	1	91	1	2	1	162.9	60.1	81.4	0	1	0	0	0	0	0	138	78	5
1124	1	91	1	2	2	156.3	59	83	0	1	0	0	0	0	1	136	79	4
1125	1	91	1	1	1	154	58.2	83	7	1	0	0	0	0	1	143	79	5
1126	1	91	1	2	1	167	68.1	87	0	1	0	0	0	0	1	156	101	4
1127	1	91	1	1	2	168	60	81	3	0	0	0	0	0	1	112	79	5
1128	1	91	1	1	1	170	65	78	3	1	0	0	0	0	1	122	71	6
1129	1	91	1	2	1	159.8	55	75	7	0	0	0	0	0	1	149	86	5
1130	1	91	1	1	2	157	51.5	87	0	1	0	0	0	0	1	131	83	5
1131	1	91	1	1	1	165	62	80	0	1	0	0	0	0	0	125	75	5
1132	1	91	1	2	1	151.7	57.4	83.5	7	1	0	0	1	0	0	161	80	5
1133	1	91	1	2	1	160.2	60.2	86	7	1	0	0	0	0	0	158	79	6
1134	1	91	1	3	1	174	69	83	0	1	0	0	1	0	1	126	81	5
1135	1	91	1	3	1	158	61	88	7	1	0	0	0	0	1	129	70	5
1136	1	91	1	2	1	158.5	52.8	75	7	1	0	0	1	0	1	130	69	6
1137	1	91	1	4	1	161	59	85	7	0	1	1	0	0	1	127	77	3
1138	1	91	1	1	2	156.5	73.7	105	0	1	0	0	0	1	1	127	70	3
1139	1	91	1	1	1	157	52.6	90	7	1	0	0	0	0	1	152	76	5
1140	1	91	1	1	1	173	57.2	81	0	1	0	0	0	0	1	132	81	5
1141	1	91	1	3	1	151.3	52.9	77	7	1	0	0	0	0	1	153	80	6
1142	1	91	1	1	1	148	51	80	7	1	0	0	0	0	1	132	67	6
1143	1	91	1	4	1	166	62	83	0	1	0	1	0	0	1	131	82	4
1144	1	91	1	2	1	147	42	78	0	1	1	0	0	0	1	146	90	4
1145	1	91	1	1	1	145	51	87	0	1	0	0	0	0	1	146	84	4
1146	1	91	1	1	1	156	50	80	0	1	0	0	0	0	1	128	69	5
1147	1	91	1	3	1	151.5	55.1	89	7	1	0	1	0	0	0	145	76	4
1148	1	91	1	1	1	168	72	94	1	1	1	0	1	0	1	121	65	2
1149	1	91	1	1	1	159	60	86	1	1	0	0	1	0	1	129	72	5
1150	1	91	1	2	1	167	60	86	0	1	0	0	1	0	1	129	76	5
1151	1	91	1	1	1	159	60	85	0	1	0	0	0	0	1	135	79	5
1152	1	91	1	3	1	160	62	88	1	1	0	0	1	1	1	132	76	4
1153	1	91	1	2	1	171	74.8	87	0	1	1	0	0	0	1	174	81	3
1154	1	91	1	1	2	162	61	90	0	1	1	0	0	0	1	176	85	3
1155	1	91	1	3	1	162	55	70	0	1	0	0	1	0	0	100	70	5
1156	1	91	1	1	1	159.4	58.5	92	0	1	0	0	0	0	1	110	75	4
1157	1	91	1	1	1	167	54	83	1	1	0	0	0	0	1	139	78	5
1158	1	91	1	1	1	168	57	66	7	1	0	0	0	0	1	123	72	6
1159	1	91	1	3	1	174	60	80	7	1	0	0	1	0	1	148	70	6
1160	1	91	1	1	1	158	50	68	0	1	0	0	0	0	1	119	75	5
1161	1	91	1	1	1	154	54.7	78	0	1	1	0	0	0	0	149	60	4
1162	1	91	1	4	1	158	63.3	88.3	7	1	0	0	0	0	1	145	66	5
1163	1	91	1	1	1	165	55	80	3	1	0	1	0	0	1	120	70	5
1164	1	91	1	1	1	160	49.8	70	0	1	0	0	0	0	1	132	81	5
1165	1	91	1	1	2	160	52	77	3	1	1	1	0	0	1	132	69	4
1166	1	91	1	1	1	164	57	79	0	1	0	0	0	0	1	139	76	5
1167	1	91	1	3	1	159.5	57.8	78	0	1	0	0	0	0	1	145	68	5
1168	1	91	1	2	1	167	65.5	82	1	1	0	0	0	0	1	129	74	5
1169	1	91	1	3	1	158.7	57.3	86	7	1	0	1	0	0	1	159	77	5
1170	1	91	1	3	1	166.7	50.8	77	7	1	0	0	1	0	1	132	75	5
1171	1	90	1	4	1	164	58	88	7	1	0	0	1	1	1	145	78	6
1172	1	90	1	2	1	162	62	83	7	1	0	0	0	0	1	131	74	6
1173	1	90	1	1	1	160	50	70	0	1	0	0	0	0	1	145	73	5
1174	1	90	1	3	1	163	64	79	0	1	0	0	0	0	1	135	73	4
1175	1	90	1	2	1	156.9	63.9	93	7	1	0	0	0	0	1	139	80	4
1176	1	90	1	1	1	167	67	84	7	1	0	0	1	0	1	119	79	5
1177	1	90	1	1	1	168	80	102	0	1	0	0	1	0	1	172	87	3
1178	1	90	1	2	1	170	70	80	7	1	0	0	0	0	1	115	63	5
1179	1	90	1	3	1	145.8	50.9	84	7	1	0	0	1	0	1	152	62	6
1180	1	90	1	2	1	167	68	92	7	1	0	0	1	0	1	131	78	4
1181	1	90	1	1	1	170	67	90	0	1	0	0	1	0	1	124	74	4
1182	1	90	1	1	1	157.2	53.8	84	1	1	0	0	0	0	1	143	80	5
1183	1	90	1	2	1	172	65	80	7	1	0	0	0	0	1	136	81	6
1184	1	90	1	1	1	160	61	82	1	1	1	1	0	0	1	134	76	3
1185	1	90	1	1	1	157	60	90	3	1	0	0	1	0	1	143	57	4
1186	1	90	1	1	1	174	76.1	92	7	1	0	0	0	0	1	134	74	4
1187	1	90	1	3	2	155	57	89	7	1	0	0	1	0	1	119	70	6
1188	1	90	1	2	1	174	70	87	0	1	1	0	1	1	1	133	73	4
1189	1	90	1	3	1	159.5	67.4	96	7	1	0	0	0	0	1	125	80	4
1190	1	90	1	1	1	153	61	86	7	1	1	0	0	0	1	128	68	4
1191	1	90	1	1	1	170	65	75	0	1	0	0	0	0	0	137	76	5
1192	1	90	1	2	2	159.5	59	83	0	1	1	0	0	0	1	109	61	4
1193	1	90	1	3	1	156.2	48.6	73	3	1	0	1	1	0	1	133	79	5
1194	1	90	1	3	1	154	46.5	78	7	1	0	0	0	0	1	159	77	6
1195	1	90	1	3	1	160	58.4	78	7	1	0	1	1	0	1	158	81	5
1196	1	90	1	2	1	157.5	59.5	88	0	1	0	0	0	0	1	131	81	4
1197	1	90	1	2	1	160.1	53.8	78	7	1	1	0	0	0	0	115	64	5
1198	1	90	1	3	2	164	73	100	7	1	1	1	0	0	1	161	91	2
1199	1	90	1	1	1	149.6	48.4	83	7	1	1	1	1	0	1	134	73	4
1200	1	90	1	1	1	168	65	81	7	1	1	0	0	0	1	128	74	5
1201	1	90	1	1	1	162.5	64	91	0	1	0	0	1	0	1	142	69	3
1202	1	90	1	1	2	167	68	83	0	1	0	0	0	0	1	143	67	4
1203	1	90	1	3	1	170	60.5	75	3	1	0	0	0	1	1	133	75	6
1204	1	90	1	1	2	161	52.3	84	7	1	0	1	0	0	1	156	88	5
1205	1	90	1	2	1	163	55	68	0	1	0	0	0	0	1	129	75	5
1206	1	90	1	1	1	170	61	83	0	1	0	0	1	0	1	135	80	5
1207	1	90	1	2	2	156	72	86	7	1	0	1	1	1	1	129	79	4
1208	1	90	1	1	1	171.5	70.2	91	0	1	0	0	0	0	1	130	72	4
1209	1	90	1	1	1	164	68.7	83	0	1	0	0	0	0	1	127	78	4
1210	1	90	1	2	1	169	65	75	3	1	0	0	0	0	1	129	78	6
1211	1	90	1	1	1	158.4	69.8	94	7	1	0	0	1	0	1	144	79	4
1212	1	90	1	1	1	167	69.8	93	0	1	0	0	0	0	1	148	92	3
1213	1	90	1	2	1	163	54.8	86	7	1	0	0	0	0	1	129	77	6
1214	1	90	1	1	2	170	55	80	0	1	0	0	0	0	1	107	87	5
1215	1	90	1	1	2	152	45	79	7	1	1	0	0	0	1	151	81	5
1216	1	90	1	1	1	161.4	63.1	89	7	1	0	0	1	0	1	116	60	5
1217	1	90	1	3	1	171.5	69.6	91	0	1	1	0	0	0	1	153	84	3
1218	1	90	1	3	1	170	54	73	7	1	0	0	0	0	1	119	74	6
1219	1	90	1	1	2	158	55	68	0	1	0	0	0	0	1	116	78	5
1220	1	90	1	2	1	169	60.9	90	7	1	0	0	0	0	1	130	63	5
1221	1	90	1	1	2	162	56	78	3	1	1	0	0	0	1	149	74	5
1222	1	90	1	2	1	159.5	49.5	82.2	7	1	1	1	1	0	1	102	71	4
1223	1	90	1	3	2	163	55	80	7	1	0	0	0	0	1	123	79	6
1224	1	90	1	3	1	170	63.5	75	1	1	0	0	0	0	1	141	84	5
1225	1	90	1	3	1	154.5	67.5	94	7	1	0	0	0	0	1	142	79	4
1226	1	90	1	2	1	164	57	80	0	1	0	0	0	0	1	129	82	5
1227	1	90	1	1	2	170	55.5	75	0	1	0	0	1	0	1	136	72	5
1228	1	90	1	2	2	156	57	89	0	1	1	1	0	0	1	141	84	3
1229	1	90	1	1	1	168	62	85	3	1	0	1	0	0	1	128	77	5
1230	1	90	1	1	1	163	67	81	0	1	1	0	1	0	1	119	76	3
1231	1	90	1	1	1	160	64	78	3	1	0	0	0	0	1	140	81	5
1232	1	90	1	4	1	152.9	51	80.5	7	1	0	0	0	0	1	131	68	6
1233	1	90	1	1	1	169	66	84	0	1	0	0	1	0	1	130	80	5
1234	1	90	1	2	1	153	50.3	73	7	1	1	0	0	0	1	130	62	5
1235	1	90	1	1	1	153	54	88	7	1	0	0	0	0	1	132	78	6
1236	1	90	1	1	1	159	64.9	85	0	1	0	0	0	0	1	135	64	4
1237	1	90	1	3	1	168	60.3	85	3	1	0	0	0	0	1	119	62	6
1238	1	90	1	2	1	166	55.2	78	0	1	1	1	0	0	1	123	78	3
1239	1	89	1	1	1	159	58	93	0	1	0	0	0	0	1	148	83	4
1240	1	89	1	1	1	165	55	80	0	1	0	0	0	0	0	108	72	5
1241	1	89	1	2	1	161	60	88	7	1	0	0	0	0	1	131	83	6
1242	1	89	1	1	1	148.5	51.5	77	7	1	0	0	0	0	1	169	75	6
1243	1	89	1	1	2	158	53	75	3	1	0	0	0	0	1	135	78	6
1244	1	89	1	1	1	165	70	90	7	1	1	0	0	0	1	132	68	3
1245	1	89	1	1	1	165	78	80	0	1	0	0	0	0	0	111	72	4
1246	1	89	1	1	1	170	55	72	7	1	1	0	0	0	1	120	75	5
1247	1	89	1	1	1	161	66	99	7	1	1	0	1	0	1	118	60	3
1248	1	89	1	3	1	160	60	84	3	1	0	0	1	0	1	144	81	6
1249	1	89	1	1	1	161.4	66.5	86	7	1	0	0	0	0	1	159	79	5
1250	1	89	1	1	1	158	60	70	3	1	0	0	0	0	0	145	73	5
1251	1	89	1	1	1	167	50	75	0	1	0	0	0	0	0	165	78	4
1252	1	89	1	1	1	172	70	82	0	1	0	0	1	0	1	130	85	5
1253	1	89	1	3	1	162	69	88.2	0	1	0	0	0	0	0	141	83	4
1254	1	89	1	2	1	168	65	98	7	1	0	0	0	0	1	165	62	5
1255	1	89	1	4	1	160	77	96	7	1	0	0	0	1	1	145	85	4
1256	1	89	1	2	1	168	70	88	7	1	0	1	0	0	1	132	73	4
1257	1	89	1	1	1	158	60	86	1	1	0	0	0	0	1	115	77	4
1258	1	89	1	1	1	165.6	56.3	70.5	7	1	1	0	0	0	1	143	81	5
1259	1	89	1	1	1	157.5	63.5	94	7	1	0	0	0	0	1	136	65	4
1260	1	89	1	2	1	161	52	84	7	1	1	0	0	1	1	139	59	5
1261	1	89	1	1	1	164.5	55.2	76	0	1	1	1	0	0	1	171	71	3
1262	1	89	1	1	1	156	76.2	85	0	1	1	0	1	0	1	131	71	3
1263	1	89	1	2	2	164	56	80	3	1	1	0	0	0	1	120	82	5
1264	1	89	1	4	1	167.7	67.5	92	3	1	0	0	0	0	1	161	85	4
1265	1	89	1	1	1	164	69	92	7	1	1	0	0	0	1	127	67	3
1266	1	89	1	1	2	160.5	63.1	92	0	1	0	0	0	0	1	114	63	3
1267	1	89	1	2	1	158	50	79	7	1	0	0	0	0	1	111	74	6
1268	1	89	1	1	1	172	60	76	0	1	0	0	0	0	1	119	64	5
1269	1	89	1	2	1	158	58.8	65	3	1	0	0	0	1	1	148	74	6
1270	1	89	1	1	2	153	49	78	0	1	0	0	0	0	1	137	57	5
1271	1	89	1	1	1	160	65.5	89	0	1	1	0	1	0	1	155	66	3
1272	1	89	1	2	1	165	60	84	7	1	0	0	1	0	1	138	71	6
1273	1	89	1	1	2	162	67	88	7	1	1	0	0	0	1	130	82	4
1274	1	89	1	2	1	167	75	94	7	1	0	0	1	0	1	144	71	4
1275	1	89	1	3	1	155	57	94	7	1	0	0	0	0	1	157	92	5
1276	1	89	1	2	1	166	66	98	3	1	0	0	0	0	1	130	80	4
1277	1	89	1	1	1	163	56	84	7	1	1	1	0	0	1	130	81	4
1278	1	89	1	1	1	162	63.5	85	0	1	0	0	0	0	1	137	69	4
1279	1	89	1	2	1	168	65.7	83	1	1	1	1	0	0	1	133	71	3
1280	1	89	1	1	1	159.4	53	76	7	1	0	0	1	0	1	136	62	6
1281	1	89	1	2	2	160	62	90	7	1	0	0	1	0	1	141	61	4
1282	1	89	1	1	1	156	64	94	7	1	1	0	1	0	1	147	78	3
1283	1	89	1	1	1	157.5	51.2	74	7	1	1	0	0	0	1	149	78	5
1284	1	89	1	1	1	155	58.6	94	0	1	0	0	1	0	1	172	88	3
1285	1	89	1	3	1	160	71	89	7	1	0	0	0	0	1	130	75	5
1286	1	89	1	1	1	162.8	62.3	78	7	1	0	0	0	0	1	131	63	6
1287	1	89	1	1	1	163	70	89	7	1	1	1	0	0	1	130	63	3
1288	1	89	1	2	1	171	85	98	1	1	0	0	1	0	1	143	93	3
1289	1	89	1	1	1	162	58	93	7	1	0	0	1	0	1	117	71	5
1290	1	89	1	2	1	167.5	63	86	1	1	0	0	1	0	0	135	79	5
1291	1	89	1	1	1	155	61	88	7	1	0	0	0	0	1	129	77	5
1292	1	89	1	3	1	155	57	91	7	1	0	0	0	0	1	115	65	5
1293	1	89	1	1	1	170	70	70	0	0	0	0	0	0	1	135	85	3
1294	1	89	1	3	2	164	68.5	80	0	1	0	0	0	0	1	132	80	4
1295	1	89	1	2	1	155	54	80	7	1	0	0	0	0	1	128	71	6
1296	1	89	1	1	1	161	68	96	1	1	0	0	0	0	1	131	77	3
1297	1	89	1	3	1	157	79	108	0	1	0	0	1	0	1	133	80	3
1298	1	89	1	1	1	168	58.2	92.9	0	1	0	1	0	0	0	139	73	3
1299	1	89	1	1	1	171	73	99	7	1	0	0	1	0	1	149	68	4
1300	1	89	1	4	2	161	54.9	85	1	1	0	0	0	0	1	141	73	5
1301	1	89	1	1	1	172	78	86	1	1	0	0	0	0	1	124	80	4
1302	1	89	1	4	1	163.6	56	71	3	1	0	0	0	0	0	151	68	6
1303	1	89	1	3	1	165	60	78	0	1	0	0	0	0	1	156	82	5
1304	1	89	1	2	1	154.3	52.6	85	7	1	1	1	0	0	1	128	74	4
1305	1	89	1	2	1	163	57.6	80	1	1	0	0	0	0	0	130	70	5
1306	1	89	1	2	1	165	62	83	1	1	0	0	0	0	1	129	79	5
1307	1	89	1	3	1	156	61	81	3	1	0	0	0	0	1	146	89	5
1308	1	89	1	3	1	160	49.1	78	7	1	0	0	0	0	1	121	62	6
1309	1	89	1	2	1	162	73	74	7	1	1	0	0	0	1	131	67	4
1310	1	89	1	1	2	165	75	89	3	1	0	0	1	0	1	124	74	5
1311	1	89	1	2	1	168	67	105	0	1	1	0	1	0	1	136	73	3
1312	1	89	1	1	1	162	50	75	7	1	0	0	0	0	1	119	80	6
1313	1	89	1	2	1	164	49	80	0	1	0	1	1	0	1	133	67	3
1314	1	89	1	1	1	164	62	83	7	1	0	0	1	0	1	141	65	6
1315	1	89	1	1	1	163	80	98	7	1	0	0	1	0	1	142	74	4
1316	1	89	1	2	1	165	72	83	0	1	1	0	1	1	1	172	81	3
1317	1	89	1	2	2	165	58.6	74	0	1	0	0	0	0	1	132	63	5
1318	1	89	1	4	1	153	58.9	88	3	0	0	0	0	0	1	161	85	4
1319	1	89	1	1	1	157.5	58.8	88	0	1	0	0	0	1	1	138	62	5
1320	1	89	1	1	2	167	54	75	7	1	0	0	0	0	0	133	77	6
1321	1	89	1	1	1	167.5	78.5	96	1	1	1	1	0	0	1	136	75	1
1322	1	89	1	2	1	168	61	72	3	1	1	0	1	0	1	129	78	5
1323	1	89	1	1	1	168	72	85	7	1	1	0	0	0	0	128	77	4
1324	1	89	1	3	2	158	66.3	86	7	1	1	1	0	0	1	137	80	3
1325	1	89	1	2	1	167	60	71	0	1	0	0	0	0	1	113	73	5
1326	1	89	1	1	2	166	69.4	93	7	1	0	0	1	0	0	128	87	4
1327	1	89	1	2	1	151	83.1	108	0	1	1	0	1	0	1	163	64	2
1328	1	89	1	1	1	150	42	82	0	1	0	0	0	0	1	150	94	5
1329	1	89	1	1	1	170	56	76	3	1	0	0	0	0	1	135	73	6
1330	1	89	1	1	1	170	62	78	7	1	0	0	0	0	1	135	74	6
1331	1	88	1	1	1	155.5	59.6	90	0	1	0	0	0	0	1	145	67	3
1332	1	88	1	3	1	167	63	81	7	1	0	0	0	0	1	113	74	6
1333	1	88	1	2	1	156.3	48.5	77	7	1	0	0	0	0	1	139	79	6
1334	1	88	1	4	1	167	78.5	94	3	1	0	0	0	1	1	133	87	4
1335	1	88	1	3	1	160.5	56	85	7	1	1	0	0	0	1	123	69	5
1336	1	88	1	1	1	165	72.3	88	0	1	0	0	0	0	1	128	79	4
1337	1	88	1	1	1	166	60	78	0	1	0	0	0	0	1	167	81	5
1338	1	88	1	1	1	168	70	89	7	1	0	0	0	0	1	125	70	5
1339	1	88	1	1	1	163	50	77	7	1	0	0	0	0	1	123	81	6
1340	1	88	1	3	1	167	75	99	7	1	0	0	1	0	1	159	76	4
1341	1	88	1	1	2	156.9	58.8	84	7	1	0	0	1	0	1	121	71	6
1342	1	88	1	1	1	152	47	79	0	1	0	0	0	0	1	157	79	5
1343	1	88	1	1	1	168	54	82	3	1	1	0	0	0	1	140	88	5
1344	1	88	1	2	1	161	65	80	1	1	0	0	0	0	1	140	80	4
1345	1	88	1	3	2	160	60	80	7	1	0	0	0	0	1	124	80	6
1346	1	88	1	3	1	159	55	87	7	1	0	0	0	0	1	128	70	6
1347	1	88	1	2	2	162	74.3	98	7	1	0	0	0	0	1	142	64	4
1348	1	88	1	1	1	168	70	67	0	1	0	0	0	0	1	114	78	4
1349	1	88	1	3	1	157	74.2	96	7	1	0	0	1	1	1	169	75	4
1350	1	88	1	1	1	172	63.1	80	0	1	1	0	0	0	1	133	71	4
1351	1	88	1	1	1	159	64	85	7	1	0	0	0	0	1	144	85	5
1352	1	88	1	2	2	164	56	78	7	1	0	0	0	0	1	167	68	6
1353	1	88	1	1	1	165	47	68	7	1	0	0	0	1	1	122	66	5
1354	1	88	1	1	1	158	72	93	7	1	0	0	0	0	1	120	71	4
1355	1	88	1	3	1	168	76.1	102	7	1	0	1	0	0	1	157	89	3
1356	1	88	1	3	1	162	61	82	7	1	1	0	0	0	1	165	76	5
1357	1	88	1	3	1	174	71	82	1	1	1	1	1	0	0	136	70	3
1358	1	88	1	4	2	170	60	79	0	1	0	0	0	0	1	137	79	5
1359	1	88	1	3	1	155.9	64.7	91	7	1	1	0	1	0	1	120	65	3
1360	1	88	1	1	2	165	53	83	7	1	0	0	0	0	1	132	80	6
1361	1	88	1	3	1	163.6	49.9	65	7	1	0	0	1	0	1	150	81	6
1362	1	88	1	2	1	160.7	72.1	94	7	1	0	0	0	0	1	168	84	4
1363	1	88	1	5	1	167	64	80	0	1	0	0	0	0	1	152	76	5
1364	1	88	1	1	1	170	60	82	0	0	0	0	1	0	1	144	75	4
1365	1	88	1	2	1	169	64	81	3	1	1	0	0	0	1	132	68	5
1366	1	88	1	4	1	163.2	63.9	91	7	1	0	0	0	0	1	150	61	4
1367	1	88	1	1	2	172	65	82	0	1	1	0	0	0	1	123	63	4
1368	1	88	1	1	1	147	50.2	78	7	1	0	0	0	0	1	133	69	6
1369	1	88	1	2	1	153.8	36.8	76	3	1	0	0	0	0	1	134	79	5
1370	1	88	1	3	1	166.5	75.5	95	0	1	0	0	1	0	1	137	86	3
1371	1	88	1	1	1	165.5	50.8	71	7	1	1	1	0	0	1	155	68	4
1372	1	88	1	1	2	160.5	68.9	94	3	1	0	0	1	0	1	128	66	4
1373	1	88	1	2	1	158	43.8	72	0	1	0	0	0	0	1	125	67	4
1374	1	88	1	3	1	165	60	74	1	1	0	0	0	0	1	122	73	5
1375	1	88	1	1	1	159.6	60.2	86	7	1	1	0	0	0	1	147	64	5
1376	1	88	1	1	1	160	58	80	0	1	0	0	0	0	1	130	80	5
1377	1	88	1	1	1	168	64	82	7	1	0	0	0	0	1	119	69	6
1378	1	88	1	1	1	165	60	80	7	1	0	0	0	0	1	135	78	6
1379	1	88	1	4	1	163	52	77	0	1	1	0	0	1	1	132	79	4
1380	1	88	1	2	1	163	62	88	7	1	0	0	0	0	1	172	89	6
1381	1	88	1	2	1	153.1	61.4	92	7	1	0	0	0	1	1	130	80	4
1382	1	88	1	2	1	160	70	92	7	1	1	0	0	0	1	147	67	3
1383	1	88	1	3	1	166	57	80	7	1	0	0	0	0	1	150	61	6
1384	1	88	1	2	1	163	56.9	75	7	1	0	0	0	0	1	138	84	6
1385	1	88	1	1	1	168.5	52.4	84	7	1	0	0	0	0	1	125	67	6
1386	1	88	1	1	1	159	59	81	7	1	1	0	0	0	1	167	72	5
1387	1	88	1	2	2	168	69	72	0	1	0	0	1	0	1	120	69	4
1388	1	88	1	2	1	150.5	62.5	90	0	1	0	0	1	0	1	150	85	3
1389	1	88	1	2	1	160	56.5	83	7	1	0	0	1	0	1	132	83	6
1390	1	88	1	1	1	174	55.6	86	7	1	0	0	0	0	1	146	75	5
1391	1	88	1	2	1	160.5	45.6	72	7	1	0	0	0	0	1	152	83	5
1392	1	88	1	2	1	165.5	59	76	7	1	1	0	0	0	1	147	77	5
1393	1	88	1	3	1	155.5	58.2	88	7	1	0	0	0	0	1	139	83	5
1394	1	88	1	2	1	158.6	57.2	85	7	1	0	0	0	1	0	173	81	6
1395	1	88	1	1	1	159	59.5	82	3	1	1	1	0	0	1	129	80	4
1396	1	88	1	1	1	164	60	81	0	1	0	0	1	0	1	127	74	5
1397	1	88	1	2	1	158	73.8	86	0	1	0	0	0	0	1	147	64	4
1398	1	88	1	3	1	160	53.5	82	7	1	1	0	0	0	1	152	69	5
1399	1	88	1	2	1	172	63	80	1	1	1	0	1	0	1	129	70	4
1400	1	88	1	1	1	152	48.5	78	7	1	1	0	0	0	1	142	72	5
1401	1	88	1	2	1	167	49	65	1	1	0	0	0	0	0	136	61	4
1402	1	88	1	3	1	165	68	88	1	1	0	0	0	1	1	147	80	4
1403	1	88	1	3	1	164	74	100	0	1	1	0	0	1	1	120	70	2
1404	1	88	1	1	2	142.6	60.5	102	0	1	1	1	0	0	1	139	71	1
1405	1	88	1	1	1	167	60	75	7	1	0	0	0	0	1	122	74	6
1406	1	88	1	2	1	166	56	81	1	0	1	0	0	0	1	143	91	3
1407	1	88	1	3	1	164	64	85	0	1	0	0	0	0	1	131	72	5
1408	1	88	1	1	2	162	59.8	90	7	1	0	0	0	0	1	156	72	5
1409	1	88	1	2	1	154.5	59.3	87	0	1	0	0	0	1	1	133	72	4
1410	1	88	1	2	1	165	60	78	0	1	0	0	1	0	1	130	70	5
1411	1	88	1	1	1	164	60	82	7	1	0	0	0	0	1	129	69	6
1412	1	88	1	2	1	161	49	75	0	1	1	0	0	0	1	131	78	4
1413	1	88	1	2	1	163	58	80	7	1	0	0	1	0	1	122	83	6
1414	1	88	1	2	1	168	66	86	7	1	0	0	0	0	1	136	76	6
1415	1	88	1	1	1	151.5	60	90	7	1	0	0	0	0	1	129	68	4
1416	1	88	1	1	1	158.9	58.1	80	7	1	0	0	0	0	1	112	88	6
1417	1	88	1	3	1	175	60	89	0	1	1	0	1	0	1	129	66	4
1418	1	87	1	3	1	159	59.6	87	0	1	1	0	0	0	1	132	67	4
1419	1	87	1	1	1	164.5	58	82	7	1	0	0	0	0	1	165	85	6
1420	1	87	1	2	1	162	76.1	98	7	1	0	0	0	0	1	156	83	4
1421	1	87	1	3	1	163	68	83.8	0	1	0	0	0	0	1	105	65	4
1422	1	87	1	2	1	154	54.5	80	3	1	0	0	0	0	1	121	78	6
1423	1	87	1	2	1	156	64	88	3	1	0	0	1	0	1	131	72	5
1424	1	87	1	5	1	170	58	87	3	1	1	0	1	0	1	145	78	5
1425	1	87	1	3	1	157.5	62.6	92	7	1	0	0	0	0	1	164	76	4
1426	1	87	1	1	1	161	60	74	3	1	1	1	0	0	0	120	70	4
1427	1	87	1	1	1	158.3	61	96	0	1	1	1	0	0	1	171	93	1
1428	1	87	1	1	1	160	61.7	85.8	0	1	0	0	0	0	1	141	69	4
1429	1	87	1	1	1	162	50	72	1	1	0	0	0	0	1	127	83	5
1430	1	87	1	2	1	150	49.5	79	7	1	0	0	0	0	1	149	69	6
1431	1	87	1	2	2	170	70	80	0	1	0	0	1	0	1	158	73	4
1432	1	87	1	2	2	168	75.5	98	7	1	0	0	1	0	1	146	68	4
1433	1	87	1	3	1	154	70.4	104	7	1	0	0	0	0	1	152	77	4
1434	1	87	1	2	1	160	60.5	84	0	1	1	0	0	0	1	156	78	4
1435	1	87	1	1	1	162	55	80	7	1	0	0	0	0	0	131	73	6
1436	1	87	1	1	1	163	72	88	7	1	0	0	0	0	1	131	81	5
1437	1	87	1	1	2	156	59.9	86	7	1	0	0	0	0	1	130	64	5
1438	1	87	1	1	2	159	52	80	0	1	1	0	0	0	1	135	76	4
1439	1	87	1	1	1	167	74.4	90	7	1	0	0	0	0	1	142	85	4
1440	1	87	1	2	2	166	59.6	82.1	7	1	0	0	1	0	1	120	70	6
1441	1	87	1	3	1	170	64	85	0	1	0	0	0	0	1	125	77	5
1442	1	87	1	1	1	162	60.4	89	7	1	0	0	0	0	1	166	77	6
1443	1	87	1	2	1	165	71	84	0	1	0	0	0	0	1	134	84	4
1444	1	87	1	1	1	166	65	84	7	1	0	0	0	0	1	140	70	6
1445	1	87	1	2	2	154	56	89	7	1	1	0	0	0	1	157	78	5
1446	1	87	1	2	1	163	54	81	0	1	0	0	0	0	1	134	77	5
1447	1	87	1	2	1	164	71	86	0	1	0	0	0	1	0	133	87	4
1448	1	87	1	2	1	162	58.2	77	7	1	0	0	0	0	1	113	73	6
1449	1	87	1	2	1	164	52.5	86	1	1	0	0	0	0	1	127	75	5
1450	1	87	1	1	1	170	63	78	3	1	1	1	0	0	1	129	70	4
1451	1	87	1	1	1	160.8	61.2	94	0	1	0	1	0	1	1	140	70	3
1452	1	87	1	4	1	153.2	64.7	96	7	1	0	0	0	1	1	170	94	4
1453	1	87	1	1	1	160	73.9	102	0	1	0	0	1	1	1	144	73	3
1454	1	87	1	3	1	158.5	63.4	90	0	1	0	0	0	0	1	144	73	3
1455	1	87	1	3	2	166.2	70.2	101	7	1	1	0	1	0	1	122	72	3
1456	1	87	1	1	2	170	65	73	1	1	0	0	0	1	1	108	71	5
1457	1	87	1	3	1	164	67	96	1	1	0	0	0	0	1	131	77	3
1458	1	87	1	2	1	152	49.9	84	0	1	0	0	0	0	1	143	80	5
1459	1	87	1	1	1	166.5	79.6	106	0	1	0	0	1	0	1	118	65	3
1460	1	87	1	1	1	170	67	88	7	1	0	0	0	0	1	117	69	6
1461	1	87	1	1	1	161	58	93	0	1	0	0	0	0	1	153	84	4
1462	1	87	1	4	1	157	64.4	89	0	1	0	0	0	0	1	119	72	4
1463	1	87	1	3	1	168	65.2	88	7	1	0	0	1	0	1	132	74	6
1464	1	87	1	1	1	150	70.5	91	0	1	1	0	0	0	1	151	70	2
1465	1	87	1	2	2	155.9	65.9	91	7	1	0	0	0	0	1	147	82	4
1466	1	87	1	2	1	170	60	76	3	1	1	0	0	0	1	130	61	5
1467	1	87	1	3	1	167	63	75	3	1	0	0	1	0	1	121	72	6
1468	1	87	1	2	2	159.5	51	70	0	1	1	1	0	0	1	131	73	3
1469	1	87	1	1	1	160	59.5	78	1	1	0	0	1	0	1	130	76	5
1470	1	87	1	2	1	160	55	78	1	1	0	0	0	0	1	130	80	5
1471	1	87	1	2	1	165	68	87	7	1	0	0	0	0	1	160	90	5
1472	1	87	1	3	1	158	67.5	88	3	1	0	0	0	0	1	132	78	5
1473	1	87	1	4	1	172	72	88	7	1	0	0	0	0	1	128	78	5
1474	1	87	1	1	1	158.5	73.3	98	7	1	1	1	0	0	1	139	71	2
1475	1	87	1	3	1	172	79	79	3	1	0	0	1	0	1	112	65	5
1476	1	87	1	1	1	165	72.5	98	0	1	0	0	1	0	1	147	83	3
1477	1	87	1	3	1	160.5	56.9	93.2	7	1	0	0	0	1	1	136	71	5
1478	1	87	1	2	2	161	59.5	85	7	1	0	0	0	0	1	177	68	6
1479	1	87	1	1	1	159.1	54	88	0	1	0	0	0	0	1	155	97	5
1480	1	87	1	2	1	166	65	90	0	1	1	0	0	0	1	127	74	3
1481	1	87	1	1	1	170	67	80	3	1	0	0	0	0	1	123	81	6
1482	1	87	1	2	1	156	54	83	7	1	0	0	0	1	1	129	73	6
1483	1	87	1	3	1	162	56	73	7	1	0	0	1	0	1	134	83	6
1484	1	87	1	3	1	159	65	93	7	1	0	0	0	0	1	131	72	4
1485	1	87	1	1	1	172	60	84	0	0	0	0	1	0	1	126	73	4
1486	1	87	1	3	1	163	63	75	1	1	0	0	0	0	0	119	69	5
1487	1	87	1	3	1	165	71.5	99	3	1	1	0	0	0	1	142	84	3
1488	1	87	1	1	1	164	62	85	7	1	0	0	0	0	1	151	89	6
1489	1	87	1	2	1	164	59.8	78	0	1	0	0	0	1	1	153	93	5
1490	1	87	1	2	1	156.5	65.2	80	0	1	0	0	0	0	1	140	61	4
1491	1	87	1	2	1	163	56	88	3	1	0	0	1	1	1	128	75	6
1492	1	87	1	2	2	156.7	58.2	84	0	1	1	0	1	0	1	98	66	4
1493	1	87	1	1	1	170	69	84	0	1	0	0	0	0	1	138	70	5
1494	1	87	1	1	2	161.6	55.5	90	3	1	0	0	1	0	1	165	85	5
1495	1	87	1	2	1	153	50.4	74	0	1	1	0	0	0	1	154	81	4
1496	1	87	1	5	1	166.9	67	84	7	1	1	0	1	0	1	128	78	4
1497	1	87	1	2	1	165	52.4	84	7	1	0	0	1	0	1	136	74	6
1498	1	87	1	2	1	159	60	72	7	1	0	0	0	0	1	127	69	6
1499	1	87	1	2	1	150	64	97	7	1	0	0	0	1	1	158	68	4
1500	1	87	1	1	1	164	49	85	0	1	0	0	0	0	1	151	70	4
1501	1	87	1	1	1	167	70	99	0	1	0	0	1	0	1	148	86	3
1502	1	87	1	1	2	169	69.4	92	1	1	0	0	0	0	0	141	67	3
1503	1	87	1	4	1	160.5	48.8	67	7	1	0	0	0	1	1	135	67	6
1504	1	87	1	3	1	165	54	91	3	1	1	0	0	0	1	118	61	4
1505	1	87	1	2	1	159.8	68.2	92	7	1	0	1	0	0	1	158	87	3
1506	1	87	1	2	1	158.5	52.8	88	0	1	1	0	0	0	1	135	68	4
1507	1	87	1	2	2	140.8	50.9	74	0	1	0	0	0	0	1	160	81	4
1508	1	87	1	1	1	169.5	62	87	7	1	0	0	0	0	1	136	90	6
1509	1	87	1	2	1	167	76.4	99	0	1	0	0	0	0	1	151	78	3
1510	1	87	1	2	1	166.5	53	67	0	1	1	1	1	0	1	132	71	3
1511	1	87	1	2	1	161.9	66.1	91	0	1	1	0	0	0	1	166	101	2
1512	1	87	1	2	1	159.5	74.1	88	0	1	1	0	0	0	1	172	85	3
1513	1	87	1	3	1	161.4	66.9	90.5	7	1	0	0	1	0	1	148	73	4
1514	1	87	1	4	1	164	53	83	7	1	1	1	0	0	1	123	68	4
1515	1	86	1	1	1	158	49	70	0	1	0	0	0	0	0	122	82	5
1516	1	86	1	2	1	159.7	74	96	3	1	1	0	0	0	1	103	83	3
1517	1	86	1	2	1	168.5	64	92	7	1	0	0	0	0	1	131	74	5
1518	1	86	1	1	1	158	75	85	7	1	0	0	0	0	1	130	80	5
1519	1	86	1	2	1	165	76	102	7	1	1	0	0	0	1	163	90	3
1520	1	86	1	3	1	161	66	90	1	1	0	0	0	0	1	139	78	3
1521	1	86	1	2	1	155	48	75	7	1	0	0	0	0	1	120	74	6
1522	1	86	1	1	1	164	76	99	0	1	1	1	0	0	1	155	93	1
1523	1	86	1	4	1	155.2	73.6	88	7	1	0	1	1	0	1	157	76	4
1524	1	86	1	1	1	163	71.5	92.5	7	1	0	0	0	0	1	139	81	4
1525	1	86	1	3	1	157.1	60.6	88	7	1	0	0	0	0	1	122	62	5
1526	1	86	1	1	1	167	70.1	82	7	1	1	1	1	0	1	133	71	3
1527	1	86	1	2	1	167.5	86	92	0	1	0	0	0	0	1	122	68	3
1528	1	86	1	3	1	158	51.2	76	0	1	0	0	0	0	1	138	71	5
1529	1	86	1	3	1	167	65	77	0	1	0	0	0	0	1	126	79	5
1530	1	86	1	4	1	160.3	70.9	99	7	1	0	0	1	0	1	153	81	4
1531	1	86	1	2	1	150	52.1	82	0	1	0	0	0	0	1	152	67	5
1532	1	86	1	3	2	159.1	58.4	84	7	1	0	0	0	0	1	160	79	6
1533	1	86	1	1	2	159.5	58.1	79	7	1	1	1	0	0	1	120	70	4
1534	1	86	1	1	2	160	61	65	0	1	0	0	1	1	1	119	67	5
1535	1	86	1	1	1	155.1	50.6	74	7	1	1	0	0	0	1	148	79	5
1536	1	86	1	1	1	171	68	85	0	1	0	0	1	0	1	133	79	5
1537	1	86	1	2	1	156.3	46.8	79	0	1	1	0	0	0	1	150	70	4
1538	1	86	1	3	1	163	65	79	7	1	1	1	0	0	1	131	67	3
1539	1	86	1	2	1	158	66	97	1	1	0	0	0	0	1	132	78	3
1540	1	86	1	2	1	155.5	43.7	73.5	7	1	0	0	0	0	1	112	77	5
1541	1	86	1	2	1	160	59	89	7	1	1	0	0	0	1	127	66	5
1542	1	86	1	2	1	160.5	52.6	67	7	1	1	1	0	0	1	125	85	4
1543	1	86	1	2	2	164	67	83	0	1	1	0	0	1	1	166	81	3
1544	1	86	1	1	1	167.5	69.1	97	7	1	0	0	0	0	1	120	66	4
1545	1	86	1	2	1	167	68	95	7	1	0	0	1	0	1	127	62	4
1546	1	86	1	2	1	165	58	85	7	1	1	0	0	0	1	126	81	5
1547	1	86	1	2	1	164.5	60.5	87	7	1	0	0	1	1	1	156	61	6
1548	1	86	1	4	1	158.5	46	68	7	1	1	1	0	0	1	123	70	3
1549	1	86	1	4	2	163.7	55.5	74	7	1	1	0	0	0	1	125	58	5
1550	1	86	1	2	1	166	62.5	85	0	1	0	0	0	0	1	139	88	5
1551	1	86	1	4	1	168	50	75	7	1	1	1	0	0	1	177	95	3
1552	1	86	1	1	1	146	49	82	7	1	0	0	0	0	1	143	69	6
1553	1	86	1	1	1	172	63	87	3	1	0	0	0	0	1	122	76	6
1554	1	86	1	2	1	155	50	74	7	1	1	0	0	0	1	159	77	5
1555	1	86	1	2	1	165	64	82	0	1	0	0	0	0	1	112	71	5
1556	1	86	1	1	1	163	61	72	0	1	0	0	0	0	1	125	78	5
1557	1	86	1	1	1	164	53	84	3	1	1	0	0	0	1	129	63	5
1558	1	86	1	1	1	165	60	78	7	1	0	0	1	0	1	121	71	6
1559	1	86	1	2	1	157	53	80	0	1	1	0	1	0	1	132	75	4
1560	1	86	1	1	1	168	70	75	0	1	0	0	1	0	0	123	75	4
1561	1	86	1	4	1	159.9	54.6	78	7	1	0	0	1	0	1	161	71	6
1562	1	86	1	1	1	160	64.9	84	7	1	0	0	0	0	1	130	73	5
1563	1	86	1	2	2	153.7	51.5	79.4	7	1	0	0	0	0	1	171	81	6
1564	1	86	1	2	2	165	79.7	95	0	1	1	0	0	0	1	140	64	2
1565	1	86	1	2	1	155.5	57.5	88	0	1	0	0	0	0	1	125	66	5
1566	1	86	1	2	1	155	68	97	3	1	0	0	0	0	1	140	79	4
1567	1	86	1	3	1	164	77	97	0	1	0	0	0	0	1	128	73	3
1568	1	86	1	2	1	172	69	85	0	1	1	1	0	1	1	135	90	3
1569	1	86	1	1	1	158	56	78	7	0	1	1	0	0	1	110	65	3
1570	1	86	1	2	1	166.5	67.6	92.5	7	1	0	0	0	0	1	143	83	4
1571	1	86	1	2	1	160	60	82	1	1	1	0	0	0	1	129	69	4
1572	1	86	1	2	1	166.4	63.1	88	7	1	1	0	0	0	1	122	77	5
1573	1	86	1	1	2	163.7	51.1	79	1	1	0	1	0	0	1	165	90	4
1574	1	86	1	1	1	160	66	97	1	1	0	0	1	0	1	162	79	3
1575	1	86	1	3	1	153	49	75	0	1	1	0	0	0	1	171	100	4
1576	1	86	1	3	1	155.2	52.8	70	7	1	1	0	1	0	1	134	71	5
1577	1	86	1	1	1	160	54	76	7	1	0	0	0	1	1	147	88	6
1578	1	86	1	1	1	157.8	56.9	78	7	1	0	0	1	0	1	137	72	6
1579	1	86	1	1	1	162	56.7	83	7	1	1	0	0	0	1	120	71	5
1580	1	86	1	1	2	170	70	88	0	1	0	0	0	0	0	120	80	4
1581	1	86	1	2	1	161.3	58.7	81	1	1	0	0	1	0	1	138	88	5
1582	1	86	1	1	1	156.3	57.9	87	0	1	0	0	0	0	1	177	83	5
1583	1	86	1	1	1	166	68	88	0	1	0	0	0	0	1	137	85	4
1584	1	86	1	2	1	155	46	76	0	1	0	0	0	0	1	122	64	5
1585	1	86	1	3	1	158.8	68.7	90	7	1	1	0	0	0	1	155	92	3
1586	1	86	1	2	1	168.8	53.9	78.5	7	1	1	1	1	0	1	130	73	4
1587	1	86	1	2	2	180	74	90	7	1	1	0	0	0	1	134	71	4
1588	1	86	1	2	1	153	57.3	81	7	1	1	1	1	0	1	159	65	3
1589	1	86	1	4	1	162.5	46.2	71	1	1	0	0	0	0	1	159	83	4
1590	1	86	1	3	1	161	69	95	0	1	0	0	1	0	1	129	71	3
1591	1	86	1	3	1	160	60	88	3	1	1	0	0	0	1	135	72	5
1592	1	86	1	2	1	160	67	103	3	1	0	0	0	0	1	106	85	4
1593	1	86	1	2	1	162	58	85	1	1	0	0	0	0	1	144	77	5
1594	1	86	1	1	1	164	62	82	7	1	0	0	1	0	1	159	83	6
1595	1	86	1	2	2	156	54	80	7	1	0	0	0	0	1	123	80	6
1596	1	86	1	3	1	167.5	81.5	100	0	1	1	1	1	0	1	127	78	1
1597	1	86	1	2	1	162	62	94	0	1	0	0	1	0	1	165	67	4
1598	1	86	1	1	1	163	55	75	0	1	0	0	0	1	1	123	75	5
1599	1	86	1	2	1	170	65	84	7	1	0	0	0	0	1	123	73	6
1600	1	86	1	2	2	163.5	75.5	94	0	1	1	0	0	0	1	142	68	2
1601	1	86	1	1	1	158	47	75	7	1	1	0	0	0	1	134	77	5
1602	1	86	1	4	1	164	40	66	0	1	1	1	0	0	1	113	64	2
1603	1	86	1	3	1	153.5	63.6	86	0	1	1	0	0	0	1	153	73	3
1604	1	86	1	1	1	164.5	66.5	80	3	1	0	0	0	0	1	131	60	5
1605	1	86	1	3	1	169	83.2	94	0	1	0	0	1	0	1	159	69	3
1606	1	86	1	2	2	161.8	47	66	7	1	0	0	0	1	1	139	79	5
1607	1	86	1	1	1	159.7	59.9	76	3	1	1	0	0	0	1	128	78	5
1608	1	86	1	2	1	162	60.2	86	7	1	0	0	0	0	0	131	68	6
1609	1	86	1	4	1	163	50	78	7	1	0	0	1	0	1	138	68	6
1610	1	86	1	2	1	168	58	79	7	1	1	1	1	0	1	119	79	4
1611	1	86	1	1	1	160	60	72	0	1	1	0	0	0	1	151	90	4
1612	1	86	1	1	1	170	69.3	86	1	1	1	1	0	0	1	133	75	2
1613	1	86	1	3	1	168.8	68.3	88	7	1	0	0	0	0	1	128	74	5
1614	1	86	1	2	1	161.2	61.2	84	7	1	0	0	0	1	1	149	76	6
1615	1	86	1	5	1	165	60.2	82	3	1	0	0	0	0	1	123	79	6
1616	1	86	1	3	1	164	86.3	104	7	1	0	0	0	0	1	151	82	4
1617	1	86	1	2	1	160.5	61.6	87	7	1	0	0	1	0	1	122	84	6
1618	1	86	1	3	1	163.6	76.3	100	1	1	1	0	0	0	1	148	71	2
1619	1	86	1	3	2	165	60	78	0	1	0	0	0	0	1	148	74	5
1620	1	86	1	4	1	167.3	62	84	1	1	1	0	0	0	1	147	81	4
1621	1	86	1	1	1	174	82	105	1	1	0	0	0	0	1	108	66	3
1622	1	86	1	1	1	168	62	76	3	1	0	0	0	0	1	133	70	6
1623	1	86	1	1	1	156	55	78	3	1	0	0	0	0	1	123	73	6
1624	1	86	1	2	1	168.4	64.5	96	0	1	0	0	0	0	1	132	73	4
1625	1	86	1	1	1	161.8	75.5	100.1	7	1	0	1	0	0	1	156	87	3
1626	1	86	1	1	1	168.5	70.6	94	0	1	1	0	0	0	1	129	73	2
1627	1	86	1	1	1	157	64	87	7	1	1	0	0	0	1	139	79	4
1628	1	86	1	3	1	157	52	76	1	1	0	0	0	0	1	133	83	5
1629	1	85	1	2	1	162.4	70.7	87	7	1	0	0	1	0	1	140	71	5
1630	1	85	1	2	1	172	79	102	0	1	0	0	0	0	1	138	84	3
1631	1	85	1	2	1	164	56	79	3	1	0	0	1	0	1	133	64	6
1632	1	85	1	2	1	170	65	90	7	1	0	0	0	1	1	142	68	5
1633	1	85	1	1	1	164	69.5	88	3	1	0	0	0	0	1	132	72	5
1634	1	85	1	3	1	166	69.8	89	7	1	0	0	1	0	1	168	76	5
1635	1	85	1	1	1	157.4	54.8	75	7	1	0	0	0	0	1	143	70	6
1636	1	85	1	1	1	158	62	80	3	1	0	0	1	0	1	123	71	5
1637	1	85	1	2	1	155.2	55.8	80	7	1	0	1	0	0	1	150	71	5
1638	1	85	1	4	1	159	57	84	0	1	0	0	0	0	1	133	70	5
1639	1	85	1	1	1	172	62	82	3	1	0	0	0	0	0	135	81	6
1640	1	85	1	1	2	162	60	84	0	1	0	0	0	1	1	125	77	5
1641	1	85	1	2	1	167	70	93	7	1	0	0	1	0	1	137	77	4
1642	1	85	1	2	2	171	63	100	3	1	0	0	0	0	1	133	65	5
1643	1	85	1	1	1	162.5	70	100	7	1	1	1	0	0	1	137	79	2
1644	1	85	1	1	1	153	51.2	84	0	1	1	0	1	0	1	120	70	4
1645	1	85	1	1	1	168	51	80	0	1	0	0	0	0	1	121	79	4
1646	1	85	1	4	1	166	55.1	85	7	1	0	0	1	0	1	129	77	6
1647	1	85	1	2	1	161	70	93	1	1	0	0	1	0	1	102	77	3
1648	1	85	1	2	1	170	78	86	0	1	0	0	0	0	1	133	68	4
1649	1	85	1	2	1	166	63	89	0	1	1	0	0	0	1	141	70	4
1650	1	85	1	2	1	160	60	80	7	1	0	0	0	0	1	123	68	6
1651	1	85	1	1	1	168.7	69	75	0	1	0	0	0	0	1	133	75	4
1652	1	85	1	1	1	157	56	87	3	1	1	0	1	0	1	118	68	5
1653	1	85	1	1	1	161	62	88	3	1	1	0	0	0	1	123	67	5
1654	1	85	1	4	1	159	55	78	7	1	0	0	0	0	1	137	80	6
1655	1	85	1	2	1	163	67.8	86	0	1	0	0	0	0	1	117	80	4
1656	1	85	1	1	1	153	60.5	87	0	1	1	0	1	0	1	105	74	3
1657	1	85	1	1	1	175	70	82	7	1	0	0	0	0	1	129	71	6
1658	1	85	1	2	1	171.5	62	79	7	1	0	0	0	0	1	169	88	6
1659	1	85	1	2	1	172	75.5	95	3	1	1	0	1	1	1	129	78	3
1660	1	85	1	4	1	167	67.5	89	3	1	0	0	0	1	1	125	67	5
1661	1	85	1	4	2	156	53	72	7	1	0	0	0	0	1	142	82	6
1662	1	85	1	4	1	162	54.5	80	7	1	0	0	1	0	1	119	69	6
1663	1	85	1	2	1	162.9	72.6	95	7	1	0	0	0	0	1	157	66	4
1664	1	85	1	2	1	172	51	81	7	1	1	0	0	0	1	162	93	4
1665	1	85	1	3	1	153.5	65.3	98	7	1	0	0	0	0	1	121	75	4
1666	1	85	1	2	1	171	55	76	1	1	0	0	0	0	1	129	77	5
1667	1	85	1	1	1	158	66	87	7	1	0	0	1	0	1	160	64	5
1668	1	85	1	1	1	168	84	105	7	1	0	0	0	0	1	160	93	4
1669	1	85	1	3	1	161.5	67.9	90	0	1	0	0	0	0	0	133	73	3
1670	1	85	1	3	1	163	61	85	0	1	0	0	0	0	1	118	70	5
1671	1	85	1	1	1	164	62	76	0	1	0	0	1	0	0	132	83	5
1672	1	85	1	2	1	163	62	84	7	1	0	0	0	0	1	123	78	6
1673	1	85	1	1	1	165	67	94	0	1	0	0	0	0	1	143	86	3
1674	1	85	1	1	1	168	68.7	95	7	1	1	0	0	0	1	158	83	3
1675	1	85	1	4	1	162.5	72.7	84	7	1	0	0	0	0	1	170	82	5
1676	1	85	1	1	1	151	58	85	7	1	0	0	1	0	1	137	79	5
1677	1	85	1	1	1	168	68	85	0	1	0	0	0	0	1	147	81	4
1678	1	85	1	2	1	173	63	75	3	1	0	0	1	0	1	134	85	6
1679	1	85	1	1	1	167	67	86	7	1	0	0	0	0	0	147	70	5
1680	1	85	1	2	1	165	63	80	7	1	0	0	0	0	1	137	79	6
1681	1	85	1	2	1	156	68	85	7	1	0	1	0	0	1	127	83	4
1682	1	85	1	1	1	161.5	48.5	72	3	1	0	0	0	0	1	124	68	6
1683	1	85	1	3	1	160	62.2	85	3	1	0	0	1	0	1	159	76	5
1684	1	85	1	1	1	168.5	54.9	70	7	1	0	0	0	0	1	115	73	6
1685	1	85	1	2	1	168	60	80	1	1	0	0	0	0	1	133	83	5
1686	1	85	1	3	1	157	58.5	80	7	1	0	0	0	1	1	137	70	6
1687	1	85	1	1	1	151	53	81	1	1	0	0	1	0	1	129	77	5
1688	1	85	1	1	1	160	55	75	3	1	0	0	1	0	1	112	77	6
1689	1	85	1	3	2	165.7	55.5	78	1	0	0	0	0	0	1	120	70	4
1690	1	85	1	4	2	159.5	63	89	0	1	0	0	1	0	1	123	70	4
1691	1	85	1	2	1	167	63	78	3	1	0	0	0	0	1	133	74	6
1692	1	85	1	1	1	166	55	76	3	1	0	0	1	0	1	121	75	6
1693	1	85	1	2	1	158	59	90	7	1	1	0	1	0	1	135	83	4
1694	1	85	1	3	1	169	58	75	7	1	1	0	0	0	1	143	79	5
1695	1	85	1	2	1	164	58	70	1	1	0	0	0	0	1	130	75	5
1696	1	85	1	2	1	154	69	86	0	1	0	0	1	0	1	158	76	4
1697	1	85	1	4	1	163	70.3	90	7	1	1	0	1	0	1	122	66	3
1698	1	85	1	1	2	159.9	55.1	86	7	1	0	0	0	0	1	146	83	6
1699	1	85	1	3	1	157.3	42	67	7	1	1	0	0	0	1	142	68	4
1700	1	85	1	3	1	158.3	60.4	89	7	1	0	0	0	0	1	156	91	5
1701	1	85	1	2	1	166	60.6	79	7	1	0	0	0	0	1	166	68	6
1702	1	85	1	1	1	168	68	86	0	1	0	0	1	0	1	131	81	4
1703	1	85	1	1	1	152.6	65	95	0	1	0	0	0	0	1	139	81	3
1704	1	85	1	1	1	162	66.7	82.5	0	1	0	0	1	1	1	161	84	4
1705	1	85	1	1	1	159	51	78	7	1	0	0	0	0	1	130	75	6
1706	1	85	1	1	2	153	44.5	74	7	1	1	0	0	0	1	173	87	5
1707	1	85	1	2	1	167	82	88.8	0	1	1	0	0	0	1	154	73	3
1708	1	85	1	1	1	169	72	90	7	1	0	0	1	0	1	138	81	4
1709	1	85	1	1	1	156.8	62.2	93.8	0	1	0	0	1	0	1	131	74	3
1710	1	85	1	1	1	149	60	95	3	1	1	1	0	0	1	139	75	2
1711	1	85	1	4	1	167.8	70.7	86	3	1	1	1	0	0	1	131	76	3
1712	1	85	1	1	1	163	70	94.5	7	1	0	0	0	0	1	139	80	4
1713	1	85	1	2	1	162.5	60	82	7	1	0	0	1	0	1	126	67	6
1714	1	85	1	1	2	160	59	85	7	1	0	0	1	0	1	132	73	6
1715	1	85	1	2	1	158	52	72	7	1	0	0	0	0	1	129	73	6
1716	1	85	1	1	1	170	77.1	107	7	1	1	1	1	0	1	127	61	2
1717	1	85	1	2	1	158	72.8	102	7	1	1	0	1	0	1	135	71	3
1718	1	85	1	1	1	156.6	64.1	97	7	1	1	1	0	0	1	147	82	2
1719	1	85	1	2	1	163	55.3	81	7	1	0	0	0	0	1	172	87	6
1720	1	85	1	4	1	163	57	86.5	7	1	0	0	0	0	1	139	78	6
1721	1	85	1	2	1	170	58	74	3	1	0	0	1	0	1	121	71	6
1722	1	85	1	2	1	157	51	84	0	1	0	0	0	0	1	126	75	5
1723	1	85	1	1	1	162.5	76.8	100	0	1	0	0	0	0	0	133	83	3
1724	1	85	1	1	1	157.3	65.6	95	7	1	1	0	0	0	1	127	74	3
1725	1	85	1	4	1	163	57.8	79	7	1	0	0	1	0	1	155	76	6
1726	1	85	1	2	1	166	60	76	3	1	0	0	0	0	1	131	79	6
1727	1	85	1	2	1	161	69.8	98	7	1	0	0	1	0	1	153	81	4
1728	1	85	1	2	2	162	54.7	80	7	1	0	0	0	0	1	121	81	6
1729	1	85	1	3	1	162	61.3	89	7	1	1	0	0	1	1	153	76	5
1730	1	85	1	4	1	174.4	78.9	99	1	1	0	0	0	0	1	146	73	3
1731	1	85	1	2	1	168	70	95	0	1	0	0	0	0	1	127	74	3
1732	1	85	1	2	1	165	71.2	94	0	1	0	0	1	0	1	133	81	3
1733	1	85	1	4	1	159.4	56.4	84	0	1	0	0	1	0	1	152	70	5
1734	1	85	1	4	1	175	53	78	1	1	0	0	0	0	1	162	94	4
1735	1	85	1	1	1	171.5	69.7	88	7	1	1	0	0	1	1	150	70	5
1736	1	85	1	1	2	163	67.5	93	0	1	0	0	1	0	1	145	74	3
1737	1	85	1	1	1	168	62	90	0	1	0	0	1	0	1	128	70	4
1738	1	85	1	3	1	168	61	85	3	1	0	0	1	0	1	131	71	6
1739	1	85	1	1	1	166	60	72	0	1	1	1	0	0	0	127	83	3
1740	1	85	1	2	1	155	62.3	95	7	1	0	0	0	0	1	145	69	4
1741	1	85	1	4	1	159.1	70.3	90	1	1	1	1	0	0	1	139	77	1
1742	1	85	1	2	1	156	68	99	3	1	0	0	0	0	1	150	89	4
1743	1	85	1	2	2	160.5	59	92	7	1	1	0	0	0	1	136	66	4
1744	1	84	1	1	1	160	60	76	7	1	0	0	0	0	1	152	73	6
1745	1	84	1	1	2	176.5	88.3	89.9	7	1	0	0	0	0	1	161	83	5
1746	1	84	1	4	1	155	48.7	70	7	1	0	0	0	0	1	123	58	6
1747	1	84	1	1	1	166	75	80	7	1	1	0	1	0	0	131	75	4
1748	1	84	1	1	1	170	65	88	7	1	0	0	0	0	1	129	68	6
1749	1	84	1	2	1	150.3	39	70	7	1	1	1	1	0	1	123	61	3
1750	1	84	1	3	1	178.5	69.7	78	7	1	0	0	1	0	1	132	79	6
1751	1	84	1	3	1	160	57.2	77	7	1	0	0	0	0	1	128	75	6
1752	1	84	1	3	1	165.5	55.7	85	7	1	1	1	0	0	0	144	80	4
1753	1	84	1	1	1	171	70	86	7	1	0	0	1	0	1	167	71	6
1754	1	84	1	1	1	165	72	91	3	1	0	0	0	0	1	138	88	4
1755	1	84	1	3	1	154	57	90	7	1	0	0	1	0	1	123	63	4
1756	1	84	1	1	2	168	62	75	0	1	0	0	0	0	1	124	79	5
1757	1	84	1	1	1	159	69.2	90	7	1	1	0	0	0	1	153	79	3
1758	1	84	1	2	1	167.5	75.1	100	7	1	0	0	1	1	1	132	64	4
1759	1	84	1	3	1	170	60.6	85	7	1	0	0	0	0	1	110	67	6
1760	1	84	1	1	1	156	60	80	7	1	0	0	1	0	1	131	76	5
1761	1	84	1	1	1	160	60	80	7	1	0	0	0	0	1	132	80	6
1762	1	84	1	1	1	165	67	85	1	1	0	0	0	0	1	129	79	4
1763	1	84	1	1	1	162	59.2	78	3	1	0	0	1	0	1	128	74	6
1764	1	84	1	2	2	163	62.5	80	3	1	0	0	0	0	1	134	76	6
1765	1	84	1	3	2	163	74.7	100	0	1	0	0	1	0	1	147	68	3
1766	1	84	1	2	1	154.6	55.1	81	7	1	0	0	0	0	1	173	88	6
1767	1	84	1	1	1	159.1	52.7	82	7	1	1	0	0	0	0	136	69	5
1768	1	84	1	1	1	153	46	75	7	1	0	0	0	0	1	175	95	6
1769	1	84	1	1	1	159	61	82	3	1	1	0	1	0	1	135	78	4
1770	1	84	1	2	1	163.5	72	98	7	1	0	0	1	0	1	147	85	4
1771	1	84	1	4	1	160	55	86	0	1	0	0	0	1	1	147	93	5
1772	1	84	1	2	1	157	64	96	0	1	0	0	0	0	1	129	72	3
1773	1	84	1	3	1	168.4	70.7	95	7	1	0	0	0	0	1	140	81	4
1774	1	84	1	2	1	166	72.5	93	7	1	0	0	0	1	1	137	72	4
1775	1	84	1	2	1	165	59	76	3	1	0	0	0	0	1	136	78	6
1776	1	84	1	2	1	158.5	64.9	86	0	1	1	1	0	0	1	166	92	2
1777	1	84	1	1	1	161.5	64.6	94	3	1	0	0	1	0	1	168	82	4
1778	1	84	1	1	1	155.8	73.9	94	7	1	0	0	1	0	1	131	66	4
1779	1	84	1	1	1	170	65	85	3	1	0	0	0	0	1	139	85	6
1780	1	84	1	3	1	160	59	84	1	1	1	1	0	0	1	119	69	3
1781	1	84	1	2	1	165.5	65.9	82.8	0	1	0	0	1	0	1	120	75	4
1782	1	84	1	1	1	158	62.7	87	0	1	0	0	0	0	1	132	59	4
1783	1	84	1	4	1	162	74.5	104	7	1	0	0	0	0	1	146	81	4
1784	1	84	1	1	2	161.3	67.9	90	7	1	0	0	0	0	1	154	93	4
1785	1	84	1	2	1	160	55	77	3	0	1	1	0	0	1	129	60	3
1786	1	84	1	1	1	158	54	80.5	7	1	0	0	1	0	1	122	63	6
1787	1	84	1	2	1	162	64	89	7	1	1	0	1	0	1	157	81	4
1788	1	84	1	2	1	167	72.9	103	3	1	1	0	0	0	1	165	78	3
1789	1	84	1	1	1	157	72.3	105	7	1	0	0	1	1	1	130	75	4
1790	1	84	1	2	1	168	69	83	1	1	1	0	0	0	0	153	79	3
1791	1	84	1	3	2	160	49	77	7	1	0	0	0	0	1	143	69	6
1792	1	84	1	3	1	151	44.4	66	0	1	0	0	0	0	1	105	60	5
1793	1	84	1	3	2	165.6	71.9	94	7	1	1	0	1	0	1	168	78	3
1794	1	84	1	4	2	152	53	84	0	1	0	0	0	0	1	129	60	5
1795	1	84	1	3	1	157	65.7	91.5	1	1	0	0	0	1	1	148	82	3
1796	1	84	1	1	1	165	59	70	0	1	0	0	0	0	1	128	73	5
1797	1	84	1	4	1	167	74	84	1	1	0	0	0	0	1	128	71	4
1798	1	84	1	2	1	162.5	47	68.5	7	1	1	0	0	0	1	160	73	4
1799	1	84	1	2	1	156.6	62.1	93	7	1	0	0	0	0	1	153	78	4
1800	1	84	1	3	1	164.5	57.5	80	0	1	1	1	1	0	1	148	68	3
1801	1	84	1	3	1	161.5	70	72	7	1	0	0	0	0	1	119	79	5
1802	1	84	1	2	1	170	65	76	3	1	0	0	0	0	1	133	81	6
1803	1	84	1	2	1	167	59	80	0	1	0	0	0	0	1	118	79	5
1804	1	84	1	2	1	150	60	90	7	1	0	0	0	0	1	129	74	4
1805	1	84	1	3	1	148	56	78	7	1	0	0	0	1	1	130	71	5
1806	1	84	1	2	1	169	52	87	0	1	0	0	0	0	0	148	80	4
1807	1	84	1	1	1	160	56	87	0	1	0	0	0	0	1	149	81	5
1808	1	84	1	1	1	160	65	82	7	1	0	0	1	0	1	109	68	5
1809	1	84	1	3	1	171.4	61	79	7	1	0	0	0	0	1	123	73	6
1810	1	84	1	1	1	161	63	80	3	1	1	1	0	0	1	129	79	3
1811	1	84	1	2	1	162	54	88	7	1	0	0	1	0	1	132	79	6
1812	1	84	1	1	1	160	65	90	0	1	0	0	0	0	1	141	90	3
1813	1	84	1	3	1	163	58	75.5	0	1	0	0	0	0	1	134	80	5
1814	1	84	1	4	2	170	74.5	87	7	1	0	0	0	1	1	148	88	5
1815	1	84	1	4	1	162	70.2	89	3	1	0	0	0	0	1	117	71	5
1816	1	84	1	1	2	167	78	101	7	1	1	0	1	0	1	133	74	3
1817	1	84	1	4	1	156	58	85	7	1	0	0	0	0	1	149	65	6
1818	1	84	1	2	2	162.8	72.1	96	7	1	0	0	0	0	1	136	89	4
1819	1	84	1	2	1	160	71.7	100	7	1	0	0	0	0	1	137	87	4
1820	1	84	1	4	1	165	65.9	81.5	7	0	0	0	0	0	1	151	80	4
1821	1	84	1	1	1	172	70	83	7	1	0	0	0	0	0	128	79	6
1822	1	84	1	1	1	166	60	78	0	1	0	0	0	0	1	143	78	5
1823	1	84	1	3	1	169	63	83	7	1	1	1	0	0	1	141	89	4
1824	1	84	1	1	1	164	63	79	3	1	0	0	1	0	1	135	83	6
1825	1	84	1	1	1	152	52	75	0	1	0	1	1	0	1	126	69	4
1826	1	84	1	3	1	170	67.5	76	3	1	0	0	0	0	1	129	73	6
1827	1	84	1	2	1	161.5	65.6	89	7	1	0	0	0	0	1	144	81	5
1828	1	84	1	4	1	158	58.3	83	7	1	0	0	0	0	1	124	73	6
1829	1	84	1	1	1	166	80	92	0	1	0	0	0	0	1	139	78	3
1830	1	84	1	2	2	164.6	49	83	0	1	0	0	0	0	1	129	75	4
1831	1	84	1	1	1	160	60.7	87	1	1	1	0	0	1	1	136	76	4
1832	1	84	1	2	1	171	69.2	96	7	1	0	0	0	0	1	138	73	5
1833	1	84	1	3	1	163.5	62	76	7	1	0	0	0	0	1	137	71	6
1834	1	84	1	1	1	158	59.9	88	7	1	0	0	0	0	1	142	61	5
1835	1	84	1	2	1	158.5	50	73	7	1	0	0	0	0	1	162	82	6
1836	1	84	1	3	1	155	62	91	7	1	0	0	0	1	1	138	86	4
1837	1	84	1	4	1	156	64	85	7	1	0	0	1	0	1	123	69	5
1838	1	84	1	2	1	157	53	82	7	1	0	0	0	0	1	130	77	6
1839	1	84	1	2	2	165	66.5	82	0	1	0	0	0	0	1	140	94	4
1840	1	84	1	2	1	170	79.7	98	7	1	0	0	1	0	1	125	72	4
1841	1	84	1	4	1	168	66	75	7	1	0	0	0	0	1	113	64	6
1842	1	84	1	1	1	158	50	81	7	1	1	1	0	0	1	143	81	4
1843	1	84	1	1	1	159.5	60.3	82	7	1	0	0	0	1	1	170	74	6
1844	1	84	1	2	1	163	68	84	7	1	1	0	1	0	1	139	77	4
1845	1	84	1	5	1	164	60	89	3	1	0	0	0	0	1	123	79	6
1846	1	84	1	4	1	164	65	82	3	1	0	0	0	0	1	121	73	5
1847	1	84	1	3	1	164	62	86	0	1	0	0	0	0	1	113	71	5
1848	1	84	1	2	1	156	59.5	85	7	1	0	0	0	0	1	172	84	5
1849	1	84	1	2	1	163	82	107	7	1	1	0	0	0	1	140	66	3
1850	1	84	1	1	1	162	60.3	82	7	1	1	0	0	0	1	136	84	5
1851	1	84	1	2	1	156	53	80	0	1	0	0	1	0	1	139	65	5
1852	1	84	1	2	1	173	59.5	82	0	1	0	0	0	0	1	155	71	5
1853	1	84	1	4	1	171	76.3	97	0	1	0	0	0	0	1	127	81	3
1854	1	84	1	2	1	175	60	75	7	1	0	0	0	0	1	169	99	6
1855	1	84	1	4	1	166.5	60	85	0	1	0	0	0	0	1	132	74	5
1856	1	84	1	1	1	153	56	76	7	1	0	0	0	0	1	129	69	6
1857	1	84	1	3	1	168	60	87	7	1	1	0	0	0	0	134	79	5
1858	1	84	1	4	1	168	66	80	3	1	0	0	1	0	1	132	75	6
1859	1	84	1	2	1	168	61.7	86	7	1	0	0	0	0	1	130	78	6
1860	1	84	1	2	1	160	70	100	7	1	0	0	1	0	1	137	73	4
1861	1	84	1	4	2	161.6	78.3	102	7	1	0	0	0	0	1	147	83	4
1862	1	84	1	3	1	156	63.5	85	7	1	1	0	1	0	1	147	62	4
1863	1	84	1	4	1	152.7	57	93	7	0	0	0	0	0	1	152	90	3
1864	1	84	1	1	1	161.4	59	72	3	1	0	0	0	0	1	127	82	6
1865	1	84	1	4	2	165	62	74	7	0	0	1	0	0	1	127	66	4
1866	1	84	1	4	1	157	65.4	89	0	1	0	0	0	0	1	173	95	4
1867	1	84	1	3	1	167.3	70	92	7	1	0	1	1	0	0	144	88	3
1868	1	84	1	2	2	170	52	68	7	1	0	0	0	1	1	157	87	5
1869	1	84	1	1	1	159	57	80	0	1	1	0	1	0	1	136	65	4
1870	1	84	1	1	1	170	70	80	0	1	0	0	1	0	1	128	78	4
1871	1	84	1	2	1	168	55	69	0	1	0	0	0	0	1	111	73	5
1872	1	84	1	3	1	164	52	78	0	1	0	0	0	0	1	133	75	5
1873	1	84	1	1	1	155.2	51.8	81	7	1	1	0	1	0	1	166	81	5
1874	1	84	1	4	1	171	75.7	101	7	1	0	0	1	0	1	115	72	4
1875	1	84	1	1	1	148	72	102	7	1	1	0	1	0	1	131	70	3
1876	1	84	1	2	1	168	60	67	1	1	0	0	1	0	1	120	70	5
1877	1	84	1	2	1	160	65.4	80	7	1	1	1	0	1	1	159	76	3
1878	1	84	1	3	1	172.2	73	91	0	1	0	0	0	0	1	154	88	3
1879	1	84	1	1	2	165	62	81	7	1	0	0	0	0	1	136	69	6
1880	1	84	1	2	1	157.9	64.7	94	7	1	1	0	0	0	1	155	80	3
1881	1	84	1	1	1	153.5	72.9	85	0	1	0	0	0	0	1	136	75	4
1882	1	83	1	3	1	166	66	85	3	1	0	0	1	0	1	121	71	5
1883	1	83	1	4	1	156	65	83	7	1	0	0	0	0	1	148	79	5
1884	1	83	1	2	1	153	54	92	7	1	0	0	1	0	1	162	78	5
1885	1	83	1	3	1	160	74	98	3	1	1	0	0	0	1	164	90	3
1886	1	83	1	4	2	170.5	76.2	100	3	1	0	0	1	0	1	154	83	4
1887	1	83	1	1	1	164	56.7	82	0	1	1	0	0	0	1	165	72	4
1888	1	83	1	3	1	165	61.3	93	0	1	0	0	1	0	1	130	76	4
1889	1	83	1	2	1	160	60	81	3	1	0	0	0	0	1	122	74	6
1890	1	83	1	1	1	168	65	85	0	1	0	0	0	0	1	132	74	5
1891	1	83	1	1	1	173	76.6	98	0	1	1	1	1	0	1	161	83	1
1892	1	83	1	1	1	160	42.4	66	0	1	0	0	0	0	0	161	84	4
1893	1	83	1	4	2	152.9	58	89	7	1	0	0	0	0	1	159	79	5
1894	1	83	1	1	1	167	55	85	3	1	0	1	0	0	1	126	82	5
1895	1	83	1	3	1	158	51	76	0	1	0	0	0	0	1	134	83	5
1896	1	83	1	1	1	170	65	86	1	1	0	1	0	0	0	135	80	4
1897	1	83	1	3	1	167.8	71.2	89	3	1	1	1	0	1	1	148	83	3
1898	1	83	1	2	1	160.5	58	80	3	1	0	0	0	0	1	131	73	6
1899	1	83	1	2	1	168	72	92	7	1	1	1	0	0	1	131	70	2
1900	1	83	1	2	1	170	81	92	7	1	0	0	1	0	1	130	78	4
1901	1	83	1	2	1	157	49	70	0	1	0	0	0	0	1	127	80	5
1902	1	83	1	1	1	158.5	62.7	88	0	1	1	0	1	0	1	135	76	3
1903	1	83	1	2	1	150	54.5	80	3	1	1	1	0	0	1	129	73	3
1904	1	83	1	4	1	160	58	82	3	1	1	1	0	0	1	157	77	4
1905	1	83	1	1	1	170	75.2	89	3	1	1	1	0	0	1	124	78	3
1906	1	83	1	2	1	155.5	61.6	88	7	1	0	0	0	1	1	148	78	5
1907	1	83	1	4	1	168.6	76.8	102	7	0	0	0	0	0	1	162	82	3
1908	1	83	1	4	1	168.5	79.4	98	0	1	0	0	1	0	1	143	87	3
1909	1	83	1	1	1	170	64	88	7	1	1	1	1	0	1	119	76	4
1910	1	83	1	2	1	165	61	91	7	1	1	0	1	0	1	136	65	4
1911	1	83	1	4	1	163	55	78	7	1	0	0	0	0	1	166	95	6
1912	1	83	1	2	1	157.5	60.2	90	7	1	1	1	0	0	1	171	80	2
1913	1	83	1	3	1	165.5	65.9	94.3	0	1	0	0	0	0	0	124	75	3
1914	1	83	1	2	2	160.5	43.1	68	1	1	1	0	0	0	1	161	79	3
1915	1	83	1	3	1	163	59	82	0	1	0	0	1	0	1	133	70	5
1916	1	83	1	3	1	149	55	85	0	1	0	0	0	0	1	153	64	4
1917	1	83	1	1	1	170	83.6	104	0	1	0	0	1	0	1	126	69	3
1918	1	83	1	5	1	169	75	84	3	1	0	0	0	0	1	132	82	5
1919	1	83	1	1	2	158	65.2	86	0	1	0	0	1	0	1	162	82	4
1920	1	83	1	2	1	160	55	86	3	1	0	0	1	0	1	119	69	6
1921	1	83	1	2	1	169	64	70	0	1	0	0	0	0	1	130	78	5
1922	1	83	1	1	2	172	68	86	0	1	0	0	0	1	1	126	74	5
1923	1	83	1	1	2	157.2	65	98	7	1	0	0	0	0	1	121	71	4
1924	1	83	1	2	1	162	51.7	80	7	1	0	0	0	0	0	121	68	6
1925	1	83	1	2	1	167	64	82	7	1	1	1	1	1	1	159	76	4
1926	1	83	1	3	1	176	82	76	0	1	0	0	0	0	1	133	78	4
1927	1	83	1	2	2	177	70.3	82	7	1	0	0	0	0	1	132	63	6
1928	1	83	1	4	1	164.5	64.7	85	7	1	0	0	0	0	1	163	76	6
1929	1	83	1	1	1	163	65	82	1	0	0	0	0	0	1	119	78	3
1930	1	83	1	4	2	158.5	73	100	7	1	0	1	0	0	1	159	98	3
1931	1	83	1	1	1	159	43.4	67	7	1	0	1	0	0	1	151	97	4
1932	1	83	1	3	1	156	52	75	3	1	0	0	1	0	1	131	70	6
1933	1	83	1	2	1	166	69.6	90	0	1	0	1	0	0	0	159	80	2
1934	1	83	1	3	1	170.5	70	90	1	1	0	0	1	0	1	152	72	3
1935	1	83	1	3	1	165	53.5	77	7	1	0	1	1	0	1	126	66	5
1936	1	83	1	2	1	163	62	88	7	1	0	0	0	0	1	163	79	6
1937	1	83	1	4	1	170	69	90	3	1	0	0	0	0	1	137	77	5
1938	1	83	1	4	1	147.5	49	80	0	1	1	0	1	0	1	132	73	4
1939	1	83	1	3	1	157	65	83	7	1	0	0	1	0	1	151	65	5
1940	1	83	1	1	1	157.5	47.5	73	0	1	1	0	0	1	1	125	65	4
1941	1	83	1	4	1	160.1	59.5	86	7	1	0	0	1	0	1	136	82	6
1942	1	83	1	4	1	162.5	67.4	93.4	0	1	0	0	0	0	1	159	81	3
1943	1	83	1	1	1	165.5	62.5	81	3	1	0	1	0	0	1	125	76	5
1944	1	83	1	4	1	166	63.8	77	1	1	0	0	0	1	0	141	78	5
1945	1	83	1	2	2	156	58.3	89	7	1	0	0	1	0	1	164	75	5
1946	1	83	1	2	1	166	83.3	104	0	1	0	0	0	0	1	160	79	3
1947	1	83	1	3	1	170.5	67.1	86	0	1	0	0	0	0	1	127	65	5
1948	1	83	1	2	1	161	56.9	77	7	1	1	1	0	0	1	146	67	4
1949	1	83	1	4	1	158.5	56.9	91	7	1	0	1	0	0	1	153	76	4
1950	1	83	1	4	1	164	72	91	7	1	1	1	1	0	0	151	89	2
1951	1	83	1	1	1	158	57	89	3	1	1	0	1	0	1	159	88	5
1952	1	83	1	1	1	165.2	76.7	90.2	0	1	0	0	0	0	1	128	80	3
1953	1	83	1	3	2	165	67.8	88	7	1	1	1	0	0	1	138	71	3
1954	1	83	1	2	1	165	83.2	103	0	1	0	0	0	0	1	178	81	3
1955	1	83	1	1	1	178	66.4	82	7	1	1	0	0	0	1	132	75	5
1956	1	83	1	3	1	162.5	67.2	96	7	1	0	0	0	0	1	161	81	4
1957	1	83	1	2	1	165	55	74	7	1	0	0	0	0	1	132	81	6
1958	1	83	1	3	1	158	61.5	81	7	1	0	0	0	0	1	128	58	5
1959	1	83	1	3	2	160	60.5	84	7	1	1	1	0	0	1	138	88	4
1960	1	83	1	2	1	169	63	82	0	1	1	0	0	0	1	164	78	4
1961	1	83	1	4	1	170	68	90	0	1	1	1	0	1	1	132	73	2
1962	1	83	1	3	2	167	70	76	7	1	0	0	1	0	1	141	80	5
1963	1	83	1	1	1	162.5	62	80	7	1	1	0	0	0	1	132	71	5
1964	1	83	1	2	1	170	71	85	3	1	0	0	0	0	1	133	74	5
1965	1	83	1	2	1	166	81.5	98	7	1	0	0	0	1	1	152	95	4
1966	1	83	1	3	1	170	60	75	7	1	0	0	0	0	1	121	70	6
1967	1	83	1	2	1	168	63.3	83	0	1	0	0	0	0	1	126	67	5
1968	1	83	1	1	1	165	60	78	0	1	0	0	1	0	0	120	75	5
1969	1	83	1	4	1	156	56.1	92	3	1	0	0	1	0	1	154	89	5
1970	1	83	1	1	1	156.5	65.2	91	7	1	1	0	0	0	1	141	86	3
1971	1	83	1	4	1	155.3	45.2	78	1	1	0	0	1	0	1	130	78	5
1972	1	83	1	3	1	168	55.4	74	0	1	0	0	0	0	1	149	71	5
1973	1	83	1	1	1	151.4	57.8	80	0	1	0	0	1	1	1	144	82	4
1974	1	83	1	3	1	165.3	60.6	86	7	1	1	0	0	0	0	140	65	5
1975	1	83	1	2	1	151.3	43.9	75	7	1	0	0	0	1	1	154	69	6
1976	1	83	1	2	1	161	67	96	7	1	0	0	0	0	1	157	97	4
1977	1	83	1	2	1	161.5	62	84	7	1	0	0	0	0	1	163	89	6
1978	1	83	1	2	1	156	54	80	3	1	0	0	0	0	1	130	80	6
1979	1	83	1	3	1	163.5	64	80	7	1	0	0	1	0	1	132	72	6
1980	1	83	1	1	1	147.6	39.7	66	0	1	0	0	0	0	1	138	80	4
1981	1	83	1	3	1	172	74	80	0	1	0	0	0	0	1	129	83	4
1982	1	83	1	1	1	166	45.8	65	7	1	0	0	1	0	1	134	66	5
1983	1	83	1	2	1	167	62	86	7	1	1	0	0	0	1	139	71	5
1984	1	82	1	1	1	166.1	67.8	85	0	1	0	0	0	0	1	127	68	4
1985	1	82	1	3	1	160	60	78	0	1	0	0	0	0	1	120	70	5
1986	1	82	1	2	1	170	68	90	7	1	0	0	0	0	1	155	87	5
1987	1	82	1	2	2	153	63.2	90	7	1	0	0	0	0	1	159	85	4
1988	1	82	1	1	1	154	48	71	3	1	1	0	1	0	1	164	81	5
1989	1	82	1	3	1	160	65.2	86	7	1	1	0	1	0	1	128	76	4
1990	1	82	1	4	1	169	73.4	90	7	1	0	0	0	0	0	137	83	4
1991	1	82	1	2	1	167	58	75	0	1	0	0	1	0	1	133	71	5
1992	1	82	1	3	1	167	60	89	7	1	0	0	0	0	1	121	73	6
1993	1	82	1	1	1	160.5	58.1	81	7	1	0	0	1	0	1	137	85	6
1994	1	82	1	1	1	170	68	98	0	1	0	0	1	0	1	134	74	4
1995	1	82	1	2	1	155	63	87	3	1	1	0	0	0	1	129	74	4
1996	1	82	1	3	1	154	49.3	78.5	7	1	0	0	0	0	1	135	73	6
1997	1	82	1	2	1	170	66	80	7	1	0	0	0	0	1	133	70	6
1998	1	82	1	1	1	156	60	82	7	1	0	0	0	0	1	123	74	5
1999	1	82	1	1	1	166	67	88	7	1	0	0	1	0	0	137	73	5
[truncated: 309,995+ more rows]
